# 1 **Investigating spatiotemporal variation in the diet of Westland Petrel through** 2 **metabarcoding, a non-invasive technique**

3 Marina Querejeta<sup>1</sup>, Marie-Caroline Lefort<sup>2,3</sup>, Vincent Bretagnolle<sup>4</sup>, Stéphane Boyer<sup>1,2</sup>

4

5

6 <sup>1</sup> Institut de Recherche sur la Biologie de l'Insecte, UMR 7261, CNRS-Université de Tours,  
7 Tours, France

8 <sup>2</sup> Environmental and Animal Sciences, Unitec Institute of Technology, 139 Carrington Road,  
9 Mt Albert, Auckland 1025, New Zealand

10 <sup>3</sup> Cellule de Valorisation Pédagogique, Université de Tours, 60 rue du Plat d'Étain, 37000  
11 Tours, France.

12 <sup>4</sup> Centre d'Études Biologiques de Chizé, UMR 7372, CNRS & La Rochelle Université, 79360  
13 Villiers en Bois, France.

14

15

16

17

18

19 **Running head:** Spatiotemporal variation in diet of Westland Petrel

20

21 **Keywords:** Conservation, metabarcoding, environmental DNA, biodiversity, New Zealand,  
22 *Procellaria westlandica*

23

## 24 **Abstract**

25 As top predators, seabirds are directly impacted by any changes in marine communities,  
26 whether they are linked to climate change or caused by commercial fishing activities.

27 However, their high mobility allows them to adapt to changing conditions. For example,  
28 seabirds can adapt their foraging behaviour according to the resources available at different  
29 seasons. This capacity of adaptation comes to light through the study of their diet.

30 Traditionally, the diet of seabirds is assessed through the morphological identification of

31 prey remains in regurgitates, a method that is invasive for the bird and limited in terms of

32 resolution. However, the recent optimization of DNA-based approaches is now providing a  
33 non-invasive and more comprehensive and accurate characterization of animals' diet. Here,  
34 we used a non-invasive metabarcoding approach to characterize the diet of the Westland  
35 petrel (*Procellaria westlandica*), an endangered burrowing species, endemic to the South  
36 Island of New Zealand. We collected 99 fresh faecal samples at two different seasons and in  
37 two different sub-colonies. Besides from describing the diet of the Westland petrel, our aim  
38 was to account for seasonal and geographical variations in the diet of the petrel and assess  
39 potential links with the fishery industry in New Zealand.

40 We found that amphipods were the most common prey, or secondary prey, followed by  
41 cephalopods and fish, suggesting a close link between the composition of prey items and  
42 New Zealand's commercial fishing activities but, also, some level of natural predation.  
43 Our results show significant differences in diet between seasons (before hatching vs chick  
44 rearing season) and between sampling sites (two sub-colonies 1.5 km apart), which suggests  
45 variability and adaptability in the foraging strategy of the Westland petrel.

46 Due to its non-invasive nature, the method used here can be applied on a great number of  
47 samples to draw a comprehensive picture of the diet dynamic in seabirds and unravel their  
48 adaptability or ecological requirements. This work demonstrates how environmental DNA  
49 can inform the conservation of an endangered species with elusive foraging behaviour,  
50 providing, in this case, valuable information regarding the diet preferences of an iconic  
51 species within New Zealand's biodiversity.

## 52 **Introduction**

53 The study of animal diets is a critical component in many aspects of ecology, including  
54 community ecology (Corse et al., 2010), population dynamics (Morrison et al., 2014; Read  
55 and Bowen, 2001) and conservation biology (Lyngdoh et al., 2014; Xiang et al., 2012). In  
56 predators in particular, spatial and seasonal variations in diet composition may reflect a  
57 certain degree of flexibility in foraging behaviour (Whelan et al., 2000), that could be  
58 relevant for understanding trophic interactions and, also, for conserving endangered species  
59 (Davies et al., 2001; Farias and Kittlein, 2008; Vander Zanden et al., 2000; Vinson and  
60 Angradi, 2011). Shedding light onto these patterns is essential in the case of seabirds, which  
61 are top predators within marine ecosystems. Seabirds are known to modify their feeding  
62 habits depending on the time of the year (Harding et al., 2007; Kowalczyk et al., 2015) and  
63 their breeding site (McInnes et al., 2017a; Thompson et al., 1999). These birds spend most  
64 of their lives at sea but during the breeding season, some remain in coastal areas as their  
65 foraging trips are restricted in number and length to allow them to regularly feed their  
66 chicks in the nest. To achieve this, seabirds have adopted a variety of foraging strategies  
67 (McInnes et al., 2017a; Ydenberg et al., 1994), such as switching between short and long  
68 foraging trips to feed their chicks while maintaining their body condition during the  
69 breeding season (Baduini, 2003; Ropert-Coudert et al., 2004), or providing the chicks with  
70 highly nutritive processed stomach oil (Baduini, 2003). The majority of studies that aim at  
71 describing the diet of seabirds have been carried out during the chick rearing period only.  
72 Often, this is because data are collected based on the morphological analysis of regurgitates  
73 obtained from parents coming back to the nest to feed their chicks (Calixto-Albarrán and  
74 Osorno, 2000; Croxall et al., 1988; Klages and Cooper, 1992; Suryan et al., 2002). This  
75 approach however, leads to consider prey communities as a fixed parameter across time,  
76 instead of treating it as a dynamic pattern (Barrett et al., 2007; Komura et al., 2018).  
77 Consequently, many studies do not explore switches in diet, although it is known that the  
78 ability to switch to new prey may potentially represent a driver to escape from striking  
79 population declines and, even, from local extinctions of threatened populations (Marone et  
80 al., 2017). Many seabird populations have been decreasing rapidly in recent years (Grémillet  
81 et al., 2018; Thibault et al., 2019) and detailed knowledge of their diet preferences through  
82 space and time is key to understand and better manage current and future threats,

83 including commercial fishing activities or climate-driven changes to their ecosystem (Frainer  
84 et al., 2017).

85

86 Selecting the correct experimental design and the most efficient methodological approach  
87 for the accurate characterization of seabird diet is essential, but also challenging (Ocké,  
88 2013), mainly because direct observations of elusive seabirds (e.g. nocturnal) are difficult  
89 and rare. For decades, the morphological identification of stomach contents or regurgitates  
90 has been widely used to identify prey items of predators (Carreon-Martinez and Heath,  
91 2010; Egeter et al., 2015; Freeman, 1998; Imber, 1976; Krüger et al., 2014). However, this  
92 methodology usually requires that gut content is obtained by stimulating regurgitation after  
93 capturing individual birds through a technique that has been called “lavage” (Barrett et al.,  
94 2007; Ryan and Jackson, 1986; Wilson, 1984). Such an invasive sampling method (Lefort et  
95 al., 2019) is not only unethical, but also potentially dangerous for the birds. Furthermore,  
96 the efficiency of this method is usually limited because many individuals would have empty  
97 stomachs at the moment of sampling, and highly digested prey items may not be  
98 identifiable to genus or species level. The ability to identify prey remains from stomach  
99 content also varies in relation to prey species, because some species (in particular soft-  
100 bodied prey) are digested faster than others, leading to potential biases in the  
101 characterization of the diet (Boyer et al., 2015; Deagle et al., 2007; Gales, 1988). More  
102 recent approaches, such as fatty-acid or stable-isotope analyses, can be used to infer the  
103 trophic position of predators in the food web, as well as potential switches in feeding sites.  
104 Although they provide valuable information about trophic interactions, these methods do  
105 not reach a fine-scale resolution, usually lacking genus or species-level identification, which  
106 may be critical for the planning of conservation management actions (Bocher et al., 2000;  
107 Chérel et al., 2000; Deagle et al., 2007; Guest et al., 2009; Guillerault et al., 2017). In the last  
108 decade, parallel to the development and optimization of genomic techniques, DNA  
109 metabarcoding approaches have allowed the accurate identification of prey species within  
110 the diet of a high variety of taxa including invertebrates (Kerley et al., 2018; Mollot et al.,  
111 2014; Pinol et al., 2014; Valentini et al., 2016) and vertebrates (Andriollo et al., 2019;  
112 Guillerault et al., 2017; Kamenova et al., 2018; Leray et al., 2015; Sullins et al., 2018).

113

114 The Westland petrel (*Procellaria westlandica*) is endemic to New Zealand and listed as an  
115 endangered species on the IUCN red list (BirdLife International, 2020). It is one of the few  
116 burrowing birds breeding on the main islands. This iconic species was once widespread in  
117 New Zealand (Waugh and Wilson, 2017; Wood and Otley, 2013), but its breeding  
118 distribution is now restricted to the West Coast of the South Island, within the Paparoa  
119 National Park and its surroundings (Jackson, 1958; Waugh and Wilson, 2017) (March to  
120 November) (Landers et al., 2011). Between May and June, females lay a single egg, which is  
121 incubated by both parents during 69 days (Warham, 1990). Chick rearing is also carried out  
122 by both parents between September and November. After the breeding season, Westland  
123 petrels travel to South American waters (Baker and Coleman, 1977) where they remain until  
124 late March (Landers et al., 2011). Regarding their foraging behaviour, Westland petrels are  
125 known to be nocturnal, but they occasionally feed during daytime (Waugh et al., 2018).  
126 Previous studies based on morphological analysis of regurgitates found that their most  
127 abundant prey items were fish, followed by cephalopods and crustaceans (Freeman, 1998;  
128 Imber, 1976). The diet of Westland petrels is therefore closely linked to fishing activity in  
129 New Zealand waters. However, it remains unclear whether fishing has a net positive or  
130 negative impact on *P. westlandica*. The overall population has increased significantly since  
131 the 70's (Wood and Davis, 2003; Wood and Otley, 2013), together with the rise of fishing  
132 activity, potentially because of increase feeding on bycatch and other fishing waste.  
133 However, being trapped and killed in fishing nets is one of the main threats of *P.*  
134 *westlandica*, together with mammal predation, degradation of habitat and erosion of their  
135 nesting grounds (Taylor, 2000; Waugh et al., 2008; Waugh and Wilson, 2017).  
136 Although the diet of the Westland petrel has been assessed before (Freeman, 1998; Imber,  
137 1976), the precise composition of their current diet is unknown, as is potential temporal  
138 variations in diet throughout the breeding season. In this work, we present the first attempt  
139 to characterize the diet of this seabird through a DNA-based approach. To do this, we used a  
140 non-invasive DNA sampling approach (Lefort et al., 2019) by collecting faecal samples, and  
141 carried out a DNA metabarcoding analysis using the 16S gene to identify prey items within  
142 the diet of the Westland petrel. Prey identity was used to establish potential interactions  
143 with the fishing activity in New Zealand. The birds' diet was compared between two  
144 breeding sub-colonies (1.5 km apart), and two different times (10 weeks apart). We  
145 expected to find differences in diet between early breeding season (before hatching) and

146 late breeding season (after hatching or chick rearing), which would be consistent with  
147 switches in feeding and foraging behaviour. We expected to find no significant differences in  
148 the diet of the different sub-colonies owing to their relatively close proximity. Moreover,  
149 this study also aims to better understand the impact that fishing activities could have on  
150 Westland petrels.

151

## 152 **Material and Methods**

### 153 *Study area and sample collection*

154 A total of 99 fresh faecal samples were collected from two different sampling sites located  
155 in the West Coast of the South Island of New Zealand, the Paparoa National Park (NP) (-  
156 42.146317, 171.340293) (49 samples) and a private land (PL) (-42.164358, 171.337603) (50  
157 samples) (Table S1). Forty-eight samples were collected before hatching (BH) on the 9<sup>th</sup> and  
158 10<sup>th</sup> of July 2015, and 51 samples were collected during chick rearing (CR) on the 22<sup>nd</sup> and  
159 23<sup>rd</sup> of September 2015 (Table 1). To avoid cross-contamination, each fresh faecal sample  
160 was collected using an individual sterile cotton swab and placed in a clean, single-use  
161 Ziplock bag. Samples were then placed in a cooled icebox for transportation to the  
162 laboratory (within the following two days), where they were stored at -80°C until DNA  
163 extraction. Leaf litter samples were also collected to serve as negative controls.

164

### 165 *DNA extraction, PCR amplification and sequencing*

166 We performed a DNA extraction on one small subsample of each faecal sample, using the  
167 QIAamp DNA Stool Mini Kit for which we followed the manufacturer's protocol with few  
168 modifications. In brief, half volumes of all reagents were used and the extraction was  
169 carried out in 1.5 ml tubes, instead of 2 ml tubes. Also, after adding half an InhibitEx Tablet,  
170 we performed one centrifugation, rather than 2 (Steps 6 and 7 in the protocol were joined).  
171 Later, on step 13, we mixed 200 µl of ethanol by pipetting and 600 µl of the mix were added  
172 to the column. From step 14, volumes recommended by the manufacturer's protocol were  
173 used. Finally, samples were eluted in 100 µl of elution buffer (AE) and DNA extracts stored  
174 at -20°C.

175

176 Later, two different PCR amplifications were performed from each DNA extract. First, we  
177 used a pair of primers specific for Chordata (16S1F, 16S2R), which amplifies 155 bp of the  
178 16S gene (Deagle et al., 2009, 2005). Second, we used a pair of primers specific to  
179 Malacostraca (Chord\_16S\_F\_TagA, Chord\_16S\_R\_Short), which amplifies 205 bp of the 16S  
180 gene (Deagle et al., 2009). These two pairs of primers were chosen to allow the detection of  
181 a wide range of potential prey, including the main taxa identified morphologically in  
182 previous studies (Freeman, 1998; Imber, 1976). PCR conditions for both primer pairs were  
183 the same as in (Olmos-Perez et al., 2017), with the exception of the Taq polymerase. Here,  
184 the FirePOLE® Taq polymerase was used for all amplifications, following manufacturer's  
185 protocol (Solis BioDyne). After checking the results in a 1.5% agarose gel, PCR products were  
186 purified using magnetic beads, and for each sample, both PCR products were pooled.  
187 Second stage PCR amplifications and subsequent sequencing steps were carried out by New  
188 Zealand Genomics Limited (NZGL, University of Otago). The resulting amplicons were  
189 arranged in two plates and indexed with Nextera adapters (Index Set C) in unique  
190 combinations. Each plate included a 16S mock community sample using Index Set D.  
191 Sequencing was performed by NZGL on Illumina MiSeq 2x300bp reads (600 cycles) (Illumina  
192 MiSeq v3 reagent kit).

193

#### 194 *Bioinformatic library filtering*

195 Demultiplexing and adapter trimming was carried out by NZGL. The metabarcoding library  
196 filtering was performed using the software *vsearch v2.8.1* (Rognes et al., 2016). First, we  
197 used the *fastq\_mergepairs* command to align the forward and reverse read pairs, allowing a  
198 maximum of 25 differences between both pairs. At this stage, merged sequences that were  
199 shorter than 100bp or longer than 300bp were discarded. This step was followed by the  
200 calculation of the quality statistics for each read pair retained, using the *fastq\_eestats*.  
201 Paired reads were then filtered by quality using the *fastq\_filter* command  
202 (*fastq\_maxee=0.5*) and fastq files converted to fasta. The library was dereplicated at sample  
203 level using the *derep\_fulllength* command leading to unique sequences in each individual  
204 sample, at this point one fasta file was produced per sample. All reads were then  
205 aggregated in one single fasta file. Reads were then dereplicated across all samples, again  
206 with *derep\_fulllength* command, and singletons were removed (*minuniquesize = 2*). This  
207 step was followed by a pre-clustering step before chimera detection at 98% using the



208 *cluster\_size* command. After pre-clustering, we only retained unique sequences using *grep*  
209 command and we detected chimeras *de novo* using the *uchime\_denovo* command, again  
210 only retaining the unique sequences after this step. All non-chimeric and non-singleton  
211 sequences from each sample were then retained in a single fasta file, using a customized  
212 Perl script, *map.pl*, from the *vsearch* pipeline available at this Github repository:  
213 <https://github.com/torognes/vsearch> (last accessed on April 2020). Finally, we performed  
214 the Operational Taxonomic Unit (OTU) picking, with a cut-off threshold of 97% (Xiong and  
215 Zhan, 2018), using the *cluster\_size* command, which produced an OTU table and fasta file  
216 with all the sequences belonging to each OTU.

217

218 All OTUs were compared to the NCBI database using BLASTn (Johnson et al., 2008) and the  
219 pertinent multiple-file JSON was downloaded from the web interface. We then used a  
220 customized R script, based on the functions *fromJSON* and *classification* from R packages  
221 *rjson* (Couture-Beil and Couture-Beil, 2018) and *taxize* (Chamberlain and Szöcs, 2013),  
222 respectively, to assign a taxonomic classification to each clustered OTU. Regarding  
223 taxonomic assignment, OTUs with BLAST query coverage under 60% or BLAST identities  
224 lower than 74% were discarded. Read abundances equal to 1 (singletons among samples  
225 and OTUS) were considered as potential contamination and removed from the dataset as  
226 were any OTUs matching to Westland Petrel. Every other OTUs were retained for  
227 subsequent statistical analyses. Potential prey (or secondary prey) OTUs within the phyla  
228 Arthropoda and Chordata were assigned using the following criteria to taxonomical  
229 categories: OTUs with identity higher than 97% were determined at species level, OTUs  
230 between 93 and 97% were assigned to genus level, and OTUs with identity below 93% were  
231 assigned to family level. In the case of the phylum Mollusca, we determined the assignment  
232 threshold from the distance matrix of the alignment of the sequences. To do that, we first  
233 computed a “raw” pairwise genetic distance matrix within the alignment of 411  
234 Cephalopoda homologous retrieved from Genbank sequences using the function *dist.dna*  
235 from R package *ape* (Paradis et al., 2005), we then calculated the threshold value applying  
236 the function *localMinima* from R package *spider* (Brown et al., 2012). Based on this analysis,  
237 we used a threshold of 98.6% to assign OTUs to species level within Mollusca.

238

239



## 240 *Biodiversity analyses*

241 In order to evaluate the impact of commercial marine species on the diet of *P. westlandica*,  
242 we collected ecological information from Fishbase (Froese and Pauly, 2010) and Sealifebase  
243 (Palomares and Pauly, 2010) to determine the distribution of each prey taxa. Considering  
244 that *P. westlandica* is able to dive up to 15 m for fishing (Waugh et al., 2018), we specifically  
245 looked for information about the depth at which the prey species is usually present (shallow  
246 versus deep sea) and therefore naturally reachable for the Westland petrel. We also  
247 checked whether those prey species had been detected in previous publications (Table 1).  
248 To measure the completeness of our sampling, we evaluated the total richness of prey in  
249 the diet of *P. westlandica*, using a rarefaction curve and a bootstrap estimator using the  
250 function *specpool* in the R package *vegan* (Oksanen et al., 2013). The diet of Westland  
251 petrels was described using two different metrics. First we calculated the Frequency of  
252 Occurrence (FOO) by transforming the number of reads to presence/absence (1-0) and,  
253 subsequently, summing the counts of samples that contain a given prey item (OTU),  
254 expressed as a proportion of all samples (Deagle et al., 2019). Second, we calculated the  
255 Relative Read Abundance (RRA), which is the proportion of reads of each prey item (OTU) in  
256 a given sample (Deagle et al., 2019). These two metrics are different proxies, FOO is a proxy  
257 for occurrence and RRA is a proxy for relative food biomass (Cavallo et al., 2018; Deagle et  
258 al., 2019). FOO and RRA were calculated overall and also compared between seasons:  
259 before hatching (BH) versus chick rearing (CR); and between sub-colonies: natural park (NP)  
260 versus private land (PL).

261

262 To estimate the effects of seasonality and sub-colony location on diet diversity and  
263 composition, we computed a negative binomial Generalized Linear Model (GLM) (McCullagh  
264 and Nelder, 1989) with a log link function, applying the function *manyglm* from the R  
265 package *mvabund* (Wang et al., 2017). Two different GLM analyses were performed, one  
266 with abundance as the dependant variable and one with occurrences (presence/absence) as  
267 the dependant variable. For both GLM analyses, the predictor variables were season (two  
268 factor levels: BH and CR) and site (two factor levels: NP and PL) as well as the interaction  
269 between these variables. An analysis of Deviance (Dev) was performed to test the fitness of  
270 the model, with 999 bootstraps iterations as a resampling method (Davison and Hinkley,  
271 1997), using the function *anova.manyglm* from the package *mvabund* (Wang et al., 2017).

272

273 Finally, we estimated and plotted the standard alpha diversity, as a proxy for prey species  
274 richness, comparing the two factors studied, season and site. For that purpose, we used the  
275 functions *estimate\_richness* and *plot\_richness* from R package *phyloseq* (McMurdie and  
276 Holmes, 2012). In addition, we computed pairwise comparisons between the alpha diversity  
277 values (Shannon) of the group levels through the pairwise Wilcoxon rank sum test (Gehan,  
278 1965), using the function *pairwise.wilcox.test* from the R package *stats* (Team and others,  
279 2013).

280

## 281 **Results**

### 282 *Amplification success and library quality*

283 All 99 samples were successfully amplified with both pairs of primers and sequenced with  
284 Illumina MiSeq. We obtained a total of 9,847,628 raw reads, which resulted in 2,061,401  
285 merged reads. After quality filtering, dereplication and removal of chimeras and singletons,  
286 1,844,930 reads remained. These included only 494 (0.027%) singletons, which were  
287 removed as they were considered as potential contaminants. The remaining reads clustered  
288 into 395 OTUs. After assigning a taxonomy to each OTU, 532,228 reads had no hit against  
289 the BLAST database, 147,134 reads could not be confidently identified (low percentage of  
290 identity and/or low query coverage), 223,239 reads were considered as contaminants. The  
291 remaining 942,329 reads were considered as prey or secondary prey and, hence, were  
292 included in the subsequent analyses (Fig.S1). These prey reads belonged to 78 OTUs (Table  
293 1), and were detected in 87 out of 99 samples.

294

### 295 *Characterization of the diet of P. westlandica*

296 Species richness estimation (using bootstrap) suggested that our sampling captured 83.75%  
297 of the total diversity of prey items within the diet of *P. westlandica* (Fig.S2). Out of the 78  
298 OTUs recovered by metabarcoding, 13.69% (15 OTUs, 129,038 reads) were identified to  
299 species level, 13.77% (17 OTUs, 129,802 reads) were identified to genus level and 86.22%  
300 (61 OTUs, 812,527 reads) were identified to family level (Table 1).

301 Arthropods (crustaceans in this case) were the most common prey or secondary prey  
302 phylum across both seasons and sites. In total, they were present in 86.21% of the samples

303 (FOO) and represented 73.79% of the sequences (RRA) and 71.8% of the OTUs.  
304 Actinopterygii (bony fish) were next, being present in 37.93% of the samples and comprising  
305 15.02% of all sequences and 17.95% of all OTUs. Finally, cephalopods were present in  
306 56.32% of the samples and made up 11.17% of the sequences and 6.41% of the OTUs  
307 (Fig.1). Within arthropods, talitrids (landhoppers and sandhoppers) were by far the most  
308 abundant taxa. They were present in 85.1% of the samples and made up 73.34% of the  
309 sequences. Other minor arthropod taxa were identified, such as the families Pilumnidae  
310 (pilumnid crabs) and Penaeidae (penaeid shrimps), among others (<1% total reads; Fig.S3;  
311 Table 2). With the exception of four OTUs, which were identified to species level,  
312 arthropods were identified to family level.

313  
314 Within Chordata (fish in this case), Hoki (*Macruronus novaezelandiae*) was the most  
315 common species as it was present in 14.94% of the samples and represented 3.87% of all  
316 sequences. The Southern hake (*Merluccius australis*) and the Cocky gunard (*Lepidotrigla*  
317 *modesta*) were also important prey items, being present in 10.34% and 9. % of the samples  
318 and comprising 3.6% and 3.53% of all sequences, respectively. Next were cutlassfish,  
319 identified to family level (Trichiuridae), and present in 5.75% of the samples and comprising  
320 1.67% of all sequences. Finally, the Thorntooth grenadier (*Lepidorhynchus denticulatus*) was  
321 present in 6.9% of the samples and comprised 1.62% of all sequences. As in the case of  
322 arthropods, we detected few other minor taxa, such as the Pink cusk-eel (*Genypterus*  
323 *blacodes*) or the Hawknose grenadier (*Coelorinchus oliverianus*), among others (<1% reads:  
324 Table 2; Fig.2). Out of 14 OTUs of Actinopterygii, one OTU was identified to genus level, two  
325 OTUs were identified to family and the remaining 11 OTUs were identified to species level  
326 (Table 1).

327  
328 According to our results, within cephalopods, five different OTUs were identified as prey  
329 items and were all assigned to family level (Table 1). The most common cephalopod prey  
330 item were pencil squids (family Loliginidae), which were present in 31.03% of the samples  
331 and comprised 9.39% of all sequences. Octopodids (family Octopodidae) were present in  
332 28.74% of the samples and made up 1.73% of all sequences. Finally, Oegopsida squids  
333 (Family Histioteuthidae) were present in 1.15% of the samples but comprised less than 1%  
334 of the reads (Table 2; Fig. 2).

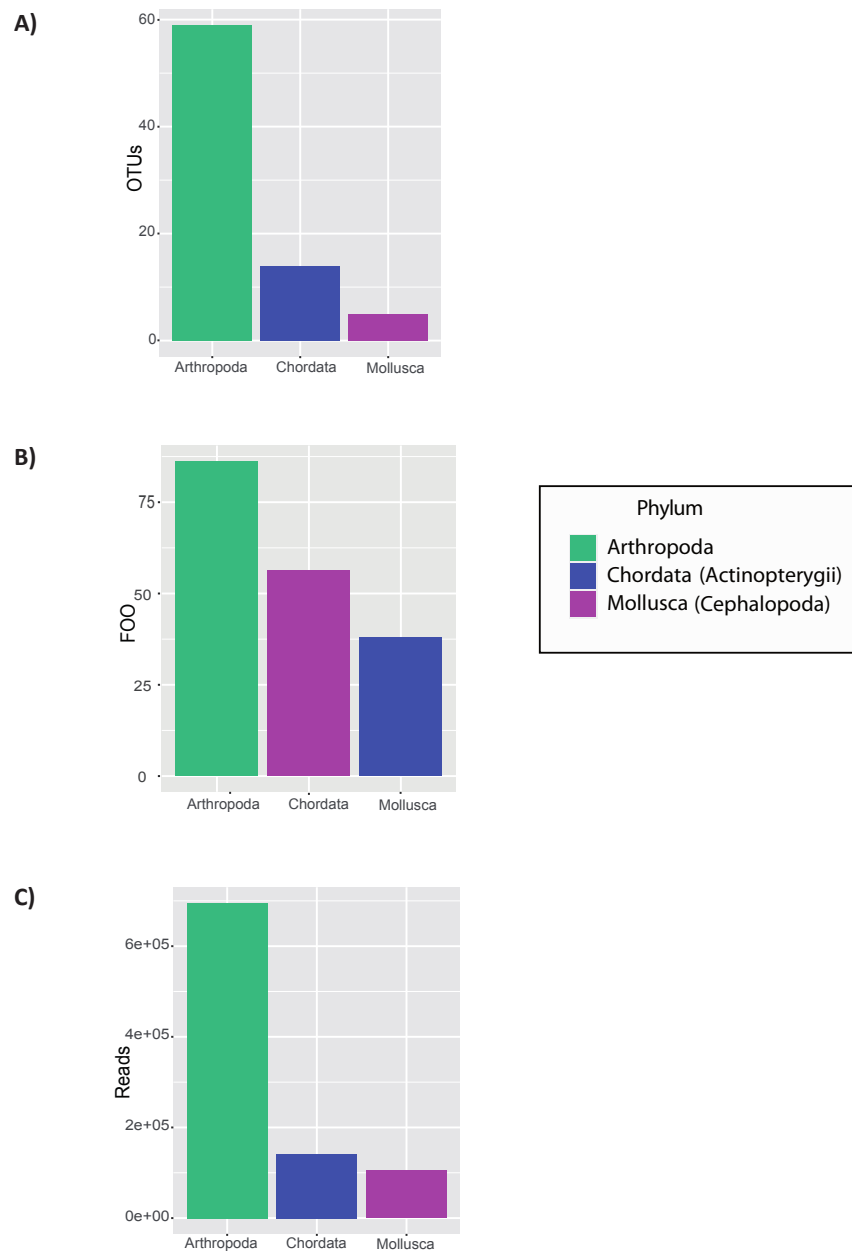

335

336 **Figure 1.** Phyla identified using three different biodiversity metrics: A) Number of OTUs as a proxy of diversity,

337 B) Frequency of occurrence (FOO) refers to the percentage of samples in which the prey item is present and C)

338 Read abundance as a proxy of relative food biomass.

339

340

A)

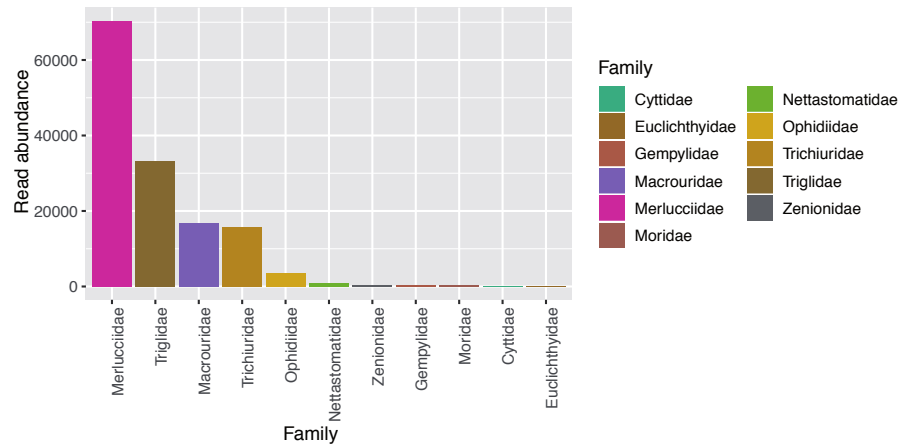

B)

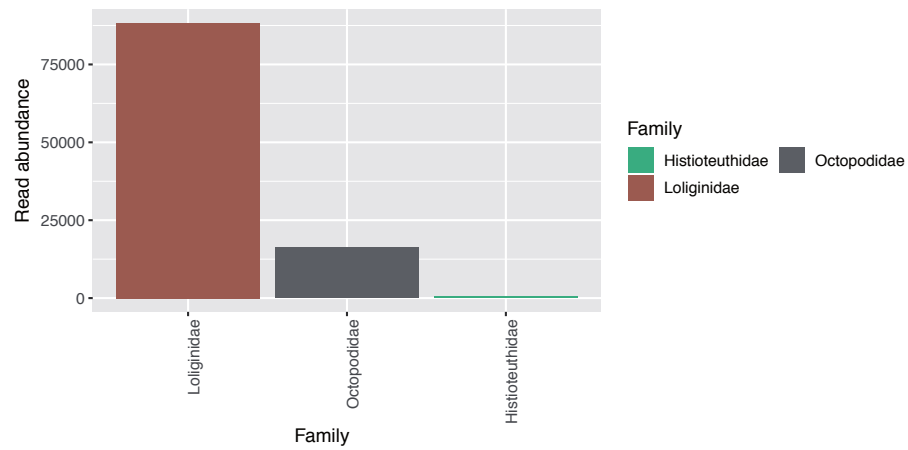

341

342 **Figure 2.** Read abundance classified by family for A) Fish prey items B) Cephalopod prey items

343

344

345 *Seasonal variation in the diet of P. westlandica*

346 According to Frequency of Occurrence (FOO) and Relative Read Abundance (RRA), our  
 347 results show important differences between seasons (Figs 3) and between sampling sites  
 348 (Fig.4).

349 Prey community composition varied significantly between the two different seasons both in  
 350 terms of read abundance (Analysis of Deviance:  $Dev_{1,87} = 205.3$ ,  $p = 0.002$ ) and prey  
 351 occurrence (Analysis of Deviance:  $Dev_{1,87} = 181.1$ ,  $p = 0.001$ ) (Fig. 3).

352 When looking at frequency of occurrence, in both seasons, crustaceans (mostly talitrids,  
 353 amphipods) were the most common prey, followed by cephalopods and then by  
 354 Actinopterygii fish (Table 2; Fig.). The same pattern was observed for relative read  
 355 abundance, except that during the early breeding season (before hatching), fish reads were  
 356 more important than those of cephalopods (Table 2; Fig.3B).

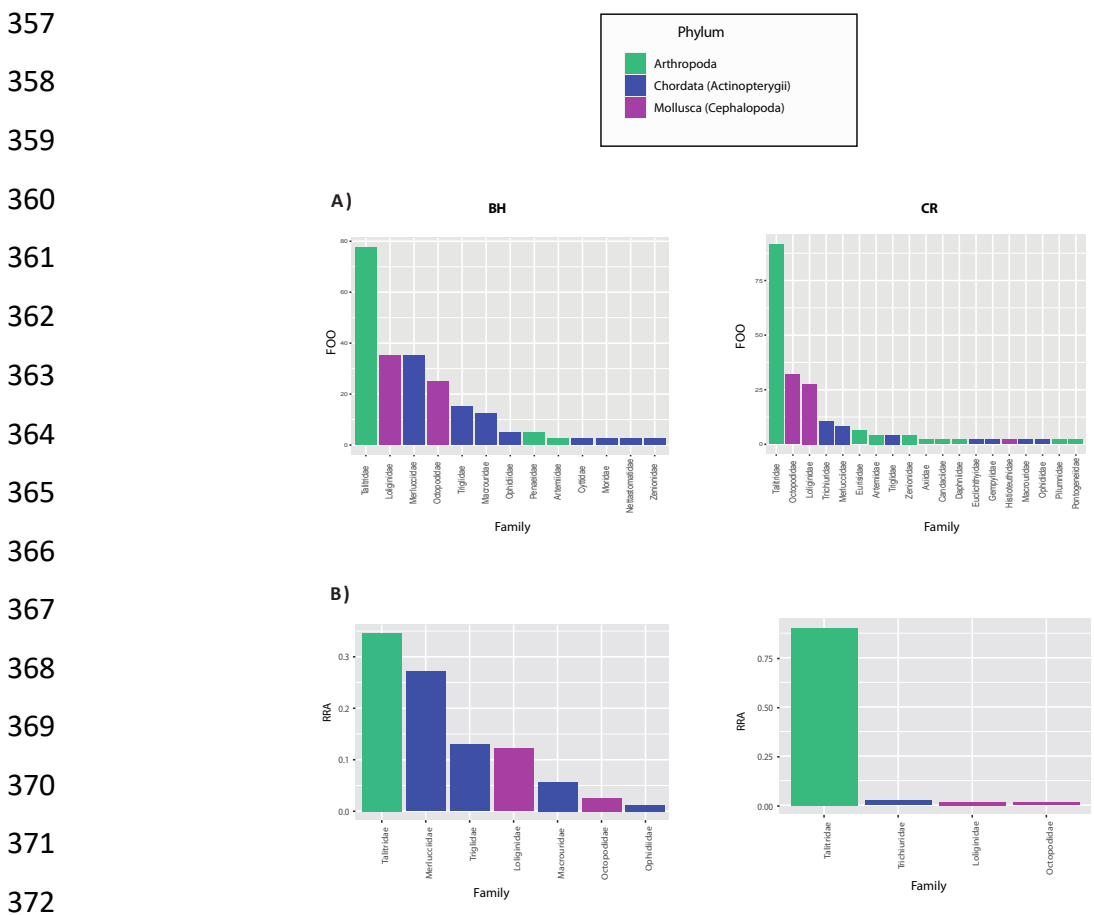

373 **Figure 3.** Seasonal variations at family level among the early breeding season or before hatching (BH) and the  
 374 late breeding season or chick rearing (CR), according to two biodiversity metrics: A) Frequency of Occurrence  
 375 (FOO) and B) Relative Read Abundance (RRA). Taxa with less than 1% of FOO or RRA were not included in the  
 376 plots.

377 Talitrids were by far the most common prey group overall and represented more than 99%  
378 of all arthropods identified in this study. Although a minor prey, the Banana shrimp  
379 (*Penaeus merguensis*), was present in 5% of samples before hatching but it was absent  
380 during the chick rearing season (Table 2).

381 Eleven species of Actinopterygii fish were identified in the samples collected before  
382 hatching, compared to ten species during the chick rearing season. Hoki was the most  
383 common fish species detected before hatching, followed by Southern Hake and Cocky  
384 gunard. During the chick rearing season, Trichiuridae fish were the most common followed  
385 by Southern hake and Cocky gunard.

386 With regards to cephalopods, Pencil squids (Loliginidae) were the most common taxa before  
387 hatching followed by octopodids (Octopodidae), while it was the other way around, during  
388 the chick rearing season. Interestingly, an Oegopsida squid (Histiotteuthidae) was also  
389 detected during the chick rearing season while it was completely absent before hatching  
390 (Table 2; Fig.3A and B).

391 Regarding species richness, the values of alpha diversity (Shannon) were significantly  
392 different between seasons, with lower diversity observed before hatching ( $\alpha$  [mean  $\pm$  SE] =  
393  $0.31 \pm 0.06$ ) compared to the chick rearing season ( $\alpha$  [mean  $\pm$  SE] =  $0.58 \pm 0.07$ ) (Fig.5).

394

#### 395 *Geographical variation in the diet of P. westlandica*

396 Significant differences in prey community were observed between the two sub-colonies,  
397 both in terms of read abundance (Analysis of Deviance:  $Dev_{1,87} = 152.6$ ,  $p = 0.015$ ) and  
398 occurrence of prey items (Analysis of Deviance:  $Dev_{1,87} = 139.5$ ,  $p = 0.017$ ) (Fig. 4).

399

400 Arthropods were found to be by far the most commonly detected prey group in both sub-  
401 colonies. However, in NP, cephalopods were more common and produced more reads than  
402 Actinopterygii fish, while in PL, these two groups had the same occurrence and  
403 Actinopterygii fish produced more reads than cephalopods.

404 Thirteen species of Actinopteriigy were identified in samples collected in the PL, while nine  
405 were found in the NP. Hoki and fish from the Trichiuridae family were the most common  
406 fish detected in NP samples, followed by Cocky gunard. In PL samples, Hoki was also the  
407 most common fish item taxa, followed, in this case, by Southern hake and Cocky gunard  
408 (Table 2).



409 With regards to cephalopods, pencil squids were the most common group followed by  
410 octopodids. However, these values did not differ as much as in the case of seasonal  
411 variation (Table 2; Fig.4A and B).

412

413 In contrast to seasonal variation, no significant differences in species richness (alpha  
414 diversity) were observed in prey diversity when comparing the two sub-colonies NP ( $\alpha$   
415 [mean  $\pm$  SE] = 0.48  $\pm$  0.07) and PL ( $\alpha$  [mean  $\pm$  SE] = 0.58  $\pm$  0.07) (Fig.5).

416

417

418

419

420

421

422

423

424

425

426

427

428

429

430

431

432

433

434

435

436

437

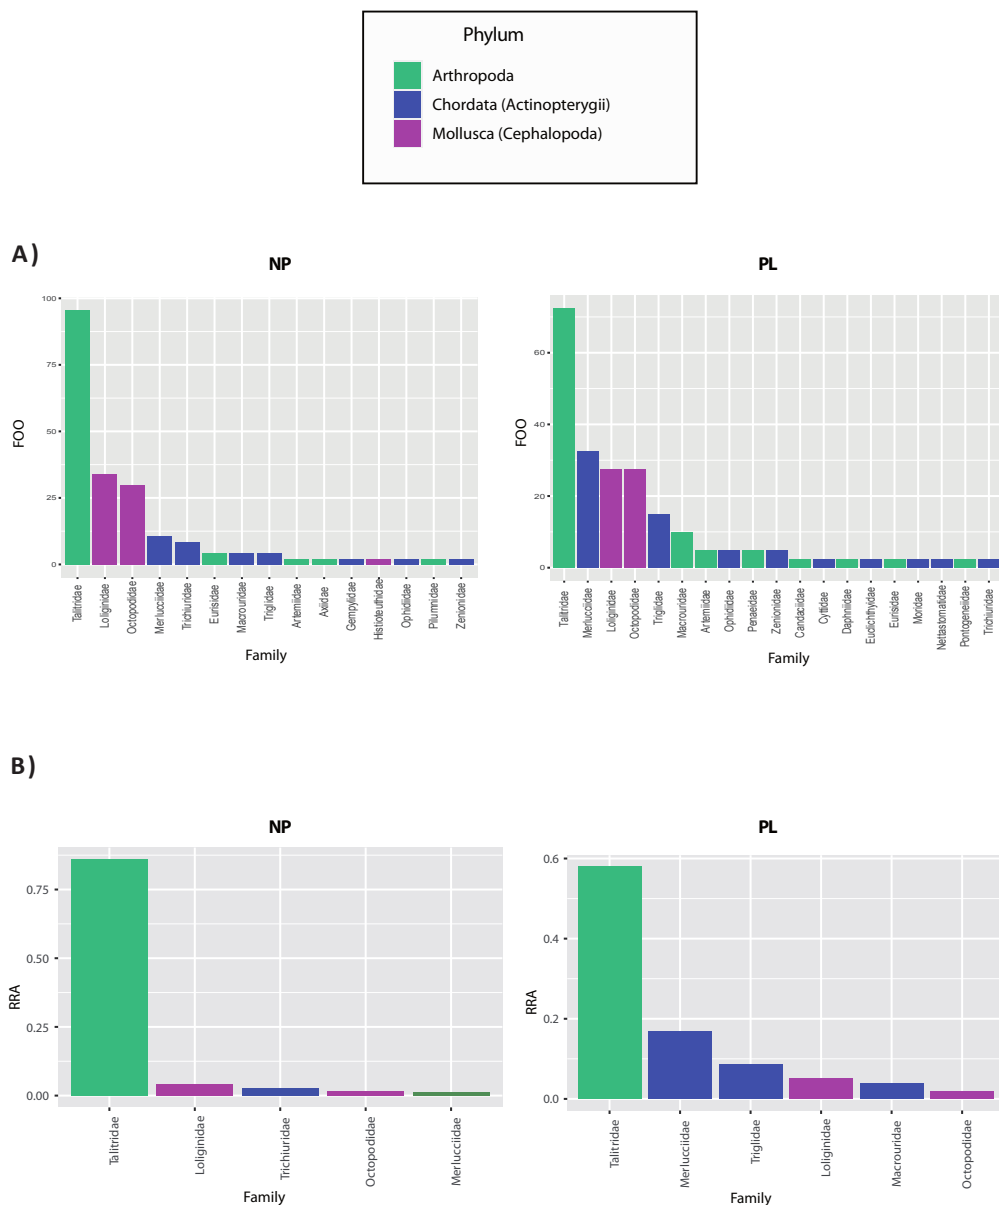

435 **Figure 4.** Geographical variations at family level among the two sub-colonies: the Paparoa National Park (NP)  
436 and the private land (PL), according to two biodiversity metrics: A) Frequency of Occurrence (FOO) and B)  
437 Relative Read Abundance (RRA). Taxa with less than 1% of FOO or RRA were not included in the plots.

A)

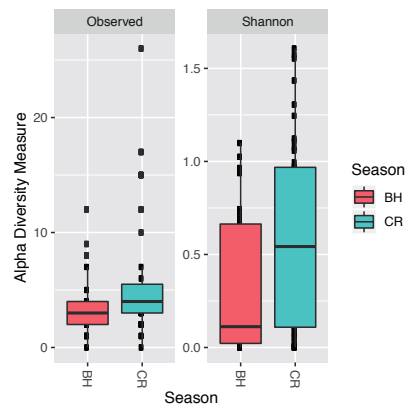

B)

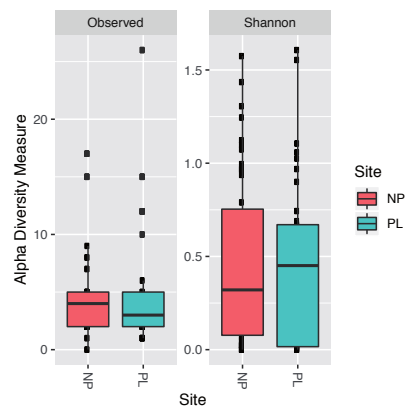

438

439 **Figure 5. A)** Seasonal and **B)** geographical differences in prey items according to alpha diversity measures.

440

## 441 Discussion

442 This is the first attempt to characterize the diet of the New Zealand endemic Westland

443 petrel using a DNA metabarcoding approach. Aside from the molecular non-invasive

444 approach, the novelty of this study lies in the analysis of samples from multiple seasons and

445 sub-colonies. The observed seasonal and geographical variations in the diet of *P.*

446 *westlandica* provide a broad picture of the feeding requirements and foraging ecology of

447 this species. Previous works on the diet of *P. westlandica* were based on morphological

448 identification of prey remains and carried out exclusively during the breeding or chick

449 rearing season (Freeman, 1998; Imber, 1976). Our study shows the presence of fish,  
450 cephalopods and amphipods (crustaceans) in the diet of *P. westlandica*, confirming the  
451 results of previous approaches (Freeman, 1998; Imber, 1976). However, the relative  
452 importance of each type of prey differs considerably between these studies and the current  
453 work, where we identified a number of taxa undetected before in such high percentage.

454

455 The phylum showing the highest percentage of prey items is Arthropoda (71.8% of the  
456 OTUs), mainly represented by the order Amphipoda. These animals can range from 1 mm to  
457 34 cm in size. However, most species are microscopical benthic zooplankton and are known  
458 to be common prey of many cephalopods (Villanueva et al., 2017) and fish, including Hoki  
459 (Connell et al., 2010; Livingston and Rutherford, 1988) and Hake (Dunn et al., 2010).  
460 Therefore, Amphipods detected in this study could potentially be secondary prey. However,  
461 several seabirds such as penguins feed regularly on amphipods (Jarman et al., 2013; Knox,  
462 2006), and large amphipods could potentially represent a fundamental food source for  
463 Antarctic seabirds (Centro de Investigacion Dinamica de Ecosistemas Marinos de Altas  
464 Latitudes, 2017), where they play a similar role as the krill (Euphausiacea) in the water  
465 column. Moreover, amphipods are found in the stomachs of other Procellariiformes, such as  
466 the Providence petrel (*Pterodroma solandri*) (Bester et al., 2011; Lock et al., 1992), the Blue  
467 petrel (*Halobaena caerulea*) (Croxall, 1987) and the Wilson's storm petrel (*Oceanites*  
468 *oceanicus*). These birds are known to feed on amphipods when krill is not available  
469 (Quillfeldt et al., 2019, 2005, 2001, 2000). Imber (1976) found no planktonic crustacean in  
470 the stomach of *P. westlandica* and Freeman (1998) only detected small percentage of taxa  
471 belonging to three different families: Euphausiidae or krill (*Nyctiphanes australis* and  
472 *Thysanoessa gregaria*), Caridea or caridean shrimps (*Notostomus auriculatus* and an  
473 unidentified species) and Cymothoidae (unidentified species). Although it remains unclear  
474 whether Amphipods are primary or secondary prey (Sheppard et al., 2005), we can confirm  
475 that these taxa play a major role in the flow of energy through the food web.

476

477 Fish are major prey items of Procellariiformes (Bester et al., 2011; Bocher et al., 2000; da  
478 Silva Fonseca and Petry, 2007; Freeman, 1998; Imber, 1976; Prince and Morgan, 1987; Spear  
479 et al., 2007; Stewart et al., 1999), and the Westland petrel is not an exception. According to  
480 our results, fish (all belonging to the order Actinopteriigy) represent 15.03% of the prey

481 reads, and are the second most abundant phylum. In addition, fish DNA was detected in  
482 37.93% of the samples. The fish species identified by our approach are consistent with  
483 previous studies (Freeman, 1998; Imber, 1976) but also include new species. In coherence  
484 with previous knowledge, the Hoki was identified as the most abundant fish prey item. We  
485 also found that Hake, another Merlucciidae not previously identified in the diet of the  
486 Westland petrel, is the second most predated fish species. Merlucciids, especially Hoki but  
487 also Hake, are some of the main fishery species caught in New Zealand waters (Livingston  
488 and Rutherford, 1988). The fishing season for Merlucciids spans mainly between June and  
489 September, thereby encompassing most of the Westland petrel's breeding season (Waugh  
490 et al., 2018; Waugh and Wilson, 2017), and including both sampling events of this study.

491  
492 Hoki and Hake live between 28 and 1,000 m below sea level (Table 1), which makes these  
493 fish not naturally catchable for Westland petrels, who only dive down to 15 m below the  
494 surface (Freeman, 1998). Therefore, it is likely that these species are scavenged from fishing  
495 vessels. The same conclusion could apply to a number of other fish species with deep depth  
496 ranges, that are naturally unreachable to the petrel, but are important fishery species  
497 (Freeman, 1998; Froese and Pauly, 2010). These include rattails (Macrouridae), such as the  
498 Thorntooth grenadier as well as two newly identified prey items, namely the Hacknose  
499 grenadier and the Banded whiptail, among other fish species living in deep sea waters  
500 (Table 1). In the case of Hoki, however, natural predation may be possible at night, as this  
501 fish species is known to migrate to surface waters to feed during the night (McClatchie and  
502 Dunford, 2003; O'Driscoll et al., 2009), when *P. westlandica* forages more actively (Waugh et  
503 al., 2018).

504  
505 Another species that could potentially have been predated naturally by the Westland petrel  
506 is the Cocky gurnard, a Perciforme belonging to the family Triglidae, which can be found  
507 sometimes in shallow waters (Froese and Pauly, 2010). However, this gurnard is also a  
508 known fishery species that could have been scavenged from the fishing waste. Also, many  
509 fish species belonging to the family Trichiuridae can live close to the surface. Myctophid  
510 fishes, which were reported to be natural prey of the Westland petrel (Freeman, 1998;  
511 Imber, 1976), were not identified in our sampling. It is possible that these species are no

512 longer selected by the Westland petrel, as previous studies were conducted more than 20  
513 years ago for Freeman (Freeman, 1998) and more than 40 years ago for (Imber, 1976).

514

515 In conclusion, our study confirms that Westland petrel extensively use fish waste from the  
516 Hoki fishery and other inshore small fisheries, at least in the winter season (Freeman, 1998),  
517 but they could also catch some fish species naturally in certain situations. It is common for  
518 opportunistic seabirds to feed on fishery waste, however, if the dependence on this food  
519 source is very high, changes and new regulations in fishing activity could modify the birds'  
520 behaviour and potentially impact their survival and population size (Abrams, 1983;  
521 Freeman, 1998; Oro et al., 1996, 1995).

522

523 According to our results, 11.18% of prey reads, belonged to cephalopods, and these taxa  
524 were detected in 56.32% of the samples (compared to 37.93% for fish). Four out of five  
525 cephalopod OTUs could only be assigned to family level. Only *Histioteuthis sp.* was assigned  
526 to genus level, a taxon already found in previous studies (Freeman, 1998; Imber, 1976). Our  
527 results are consistent with Freeman (1998), which states that fish prey items are followed  
528 by (Davies et al., 2009; Pierce et al., 2010) cephalopods within the Westland petrel's diet.  
529 *Histioteuthis sp.* are deep-sea squid (Voss et al., 1998), but migrate to surface water at night  
530 by vertical migration (Roper and Young, 1975), thus they become catchable by Westland  
531 petrel. The other two families, Loliginidae and Octopodidae, which were also identified in  
532 previous studies, are present from surface waters down to 500 m deep, and thus naturally  
533 catchable for the Westland petrel. Nevertheless, these families also include several  
534 commercial species as well as species commonly reported as bycatch (Davies et al., 2009;  
535 Pierce et al., 2010)- Therefore, it is possible that petrels fed on some cephalopods through  
536 fishery waste.

537 A number of other Mollusca prey species were, listed in previous studies (Freeman, 1998;  
538 Imber, 1976), but not detected in our approach. These include cephalopods belonging to  
539 the orders Sepioidea or Vampyromorpha, among others. It is unclear whether their absence  
540 in our analysis is due to the lack of genetic sequences in the NCBI database or a change in  
541 the feeding habits of the birds in the past 20 years.

542

543 Marked dietary switches between breeding and non-breeding seasons have been  
544 documented for several seabirds (Howells et al., 2018), and are considered a sign of  
545 plasticity in behaviour (Quillfeldt et al., 2019). These switches may reflect variation in prey  
546 availability, a change of strategy between seasons, or a combination of both (Howells et al.,  
547 2018; Paleczny et al., 2015; Sydeman et al., 2015). Because these variations can severely  
548 affect marine top predator's populations (Cury et al., 2000; Reid and Croxall, 2001) it is  
549 essential to understand their drivers to ensure the conservation of the Westland petrel.  
550 As hypothesized before, there is a clear seasonal variation in the diet of *P. westlandica*, both  
551 in terms of read abundance (food biomass) and the occurrence of prey species, meaning  
552 that the composition of the diet changes in a substantial way between incubation and chick-  
553 rearing season. This change is particularly visible for fish, but also for cephalopods, which  
554 are both more abundant before hatching than during the chick rearing season. One  
555 explanation could be that adult petrels feed their chicks with highly nutritive fish and  
556 cephalopods, while they feed themselves mainly with crustaceans (and some cephalopods).  
557 This hypothesis is highly consistent with the significant loss of weight in adult seabirds  
558 during the breeding season, while their chicks experience rapid growth (Ainley, 1990;  
559 Barrett et al., 1985; Leal et al., 2017). In this case, the choice of prey items by adults may be  
560 influenced by the developmental stage and the needs of the chicks.

561

562 Our results suggest that these changes would be more influenced by a change of foraging  
563 strategy, rather than a change in prey availability, as the peak of the Hoki fishery in New  
564 Zealand encompasses both July (before hatching period) and September (chick rearing  
565 period), which means, fishery waste would be equally available during both seasons.  
566 Our results show significant higher alpha diversity or species richness (Observed and  
567 Shannon) during the chick rearing period. The less diverse diet before hatching could be due  
568 to a higher specialization, that would require a higher investment in time and energy for the  
569 adult birds while they do not have to take care of the chicks. In contrast, one would expect a  
570 more generalist diet during chick rearing, at a time when fishing trips must be limited in  
571 time to take care of the chicks and energy management is crucial for the adults. Moreover,  
572 it has been shown that a higher diversity and, consequently, a wider range of nutrients  
573 (Hillebrand et al., 2009) increases chicks growth rate as well as their probability of fledging  
574 (van Donk et al., 2017). Another potential explanation is the fact that petrel colonies

575 comprise more non-breeding adults towards the end of the breeding season i.e. during  
576 chick rearing. These non-breeding individuals may cause a variation in the diet at the  
577 population level.

578

579 Contrary to our expectation, we found significant differences between both sub-colonies. A  
580 possible explanation of these differences is the fact that seabirds from nearby sub-colonies  
581 forage in different locations, possibly to avoid or decrease inter-colony competition (Cecere  
582 et al., 2015; Grémillet et al., 2004; Wakefield et al., 2013). Also, the diet could change every  
583 day, depending on the resource availability or the foraging behaviour and habits could be  
584 different depending on the sub-colonies. However, in order to clarify the origin of these  
585 differences in prey community composition (not in diversity) between sub-colonies, further  
586 studies on population dynamics and foraging ecology of the Westland petrel should be  
587 conducted.

588

589 Sustainable management of worldwide fishery industry needs information regarding the  
590 overlap of marine organisms, such as seabirds, with fishing industry (Frederiksen et al.,  
591 2004; McInnes et al., 2017b; Okes et al., 2009). Seabirds scavenge food from fishery waste  
592 and results in a high number of incidental kills through bycatch, potentially disturbing on  
593 population dynamics (Brothers, 1999; McInnes et al., 2017b; Sullivan et al., 2006; Tuck et al.,  
594 2011; Watkins et al., 2008; Waugh et al., 2008; Waugh and Wilson, 2017). But, also, the diet  
595 of seabirds relies on this commercial activity, as fishery waste is a nutritious prey, naturally  
596 unreachable by seabirds. That is why understanding these interactions is essential for  
597 seabird conservation and efficient ecosystem-based fishing regulation (Becker and  
598 Beissinger, 2006; Freeman, 1998; Furness, 2003; Furness and Tasker, 2000; McInnes et al.,  
599 2017b; Phillips et al., 1999; Waugh et al., 2008). In this context, non-invasive dietary studies  
600 can provide knowledge to assess risks as well as the needs of these species that may rely  
601 heavily on commercial fishing activity (Gaglio et al., 2018; McInnes et al., 2017a, 2017b).  
602 This issue is particularly urgent in the case of endangered species, such as the Westland  
603 petrel, and, in this study, we show a link between fisheries in New Zealand and the diet of  
604 the petrel, that could be taken into account in management strategies.

605



606 Our results should draw attention to the complexity that lies in the implementation of  
607 fishing and conservation regulations. In the case of Westland petrel, these regulations  
608 should take into account, not only the close link between the commercial fishing and the  
609 diet preferences of the birds, but also the high number of birds' deaths happening every  
610 year through bycatch, as the Westland petrel is the fourth seabird species in terms of  
611 bycatch risk in New Zealand (OpenSeas, 2019). Several mitigation solutions have been  
612 suggested by practitioners or already included in conservation reports, to limit the number  
613 of accidental kills in seabirds and find a sustainable equilibrium between fishery industry  
614 and threatened species. Thus, research on how seabirds in general, and Westland petrel in  
615 particular, interact with the fishing gear would help to develop bycatch reduction  
616 techniques and using or developing gear less dangerous for the seabirds.

617

### 618 **Author contribution**

619 Designed the study: SB. Obtained funding: SB. Collected samples: SB. Performed laboratory  
620 analyses: MCL, SB. Analysed the data and prepared the figures: MQ. Wrote the first draft of  
621 the manuscript MQ, SB. All authors contributed to the writing of the final manuscript.

622

### 623 **Acknowledgment**

624 This study was funded by an internal Research Development Fund obtained by SB in 2015 at  
625 Unitec Institute of Technology (RI15012). We thank Susan Waugh from Office of the  
626 Parliamentary Commissioner for the Environment for providing early samples that were  
627 used for proof of concept, and for her comments and advice on a previous version of the  
628 manuscript. We are grateful to Conservation Volunteers NZ  
629 (<https://conservationvolunteers.co.nz/>) and particularly James Washer for providing  
630 information about colony location outside of the protected area and logistical support on  
631 site. We thank Bruce Menteath from Petrel Colony tours  
632 (<http://www.petrelcolonytours.co.nz/>) for giving us access to the colony on his land and  
633 sharing his knowledge about the birds.

634 We also thank Louise Burkett and Amy Hou for their technical help as part of their  
635 internships at Unitec Institute of Technology. Also, we would like to thank Joan Garcia-Porta

636 from Washington University of Saint Louis (Missouri) for his help and advice in  
637 bioinformatics and David Ochoa Castañon for his helpful comments on bird behaviour.

638

## 639 **References**

- 640 Abrams, R.W., 1983. Pelagic seabirds and trawl-fisheries in the southern Benguela Current  
641 region. *Mar. Ecol. Prog. Ser.* Oldend. 11, 151–156.
- 642 Ainley, D.G., 1990. Seabirds of the Farallon Islands: ecology, dynamics, and structure of an  
643 upwelling-system community. Stanford University Press.
- 644 Andriollo, T., Gillet, F., Michaux, J.R., Ruedi, M., 2019. The menu varies with metabarcoding  
645 practices: A case study with the bat *Plecotus auritus*. *PLoS One* 14, e0219135.
- 646 Baduini, K.D.H.C.L., 2003. Biogeography of procellariiform foraging strategies: does ocean  
647 productivity influence provisioning? *Mar. Ornithol.* 31, 101–112.
- 648 Baker, A.J., Coleman, J.D., 1977. The breeding cycle of the Westland black petrel (*Procellaria*  
649 *westlandica*). *Notornis* 24, 211–231.
- 650 Barrett, R.T., Camphuysen, K., Anker-Nilssen, T., Chardine, J.W., Furness, R.W., Garthe, S.,  
651 Hüppop, O., Leopold, M.F., Montevecchi, W.A., Veit, R.R., 2007. Diet studies of  
652 seabirds: a review and recommendations. *ICES J. Mar. Sci.* 64, 1675–1691.
- 653 Barrett, R.T., Fieler, R., Anker-Nilssen, T., Rikardsen, F., 1985. Measurements and weight  
654 changes of norwegian adult puffins *Fratercula arctica* and kittiwakes *Rissa tridactyla*  
655 during the breeding season. *Ringing Migr.* 6, 102–112.
- 656 Becker, B.H., Beissinger, S.R., 2006. Centennial decline in the trophic level of an endangered  
657 seabird after fisheries decline. *Conserv. Biol.* 20, 470–479.
- 658 Bester, A.J., Priddel, D., Klomp, N.I., 2011. Diet and foraging behaviour of the Providence  
659 petrel *Pterodroma solandri*. *Mar. Ornithol.* 39, 163–172.
- 660 BirdLife International, 2020. IUCN Red List for birds [WWW Document].  
661 <http://www.birdlife.org>.
- 662 Bocher, P., Cherel, Y., Hobson, K.A., 2000. Complete trophic segregation between South  
663 Georgian and common diving petrels during breeding at Iles Kerguelen. *Mar. Ecol. Prog.*  
664 *Ser.* 208, 249–264.
- 665 Boyer, S., Cruickshank, R.H., Wratten, S.D., 2015. Faeces of generalist predators as  
666 ‘biodiversity capsules’: A new tool for biodiversity assessment in remote and  
667 inaccessible habitats. *Food Webs* 3, 1–6.
- 668 Brothers, N., 1999. The incidental catch of seabirds by longline fisheries: worldwide review  
669 and technical guidelines for mitigation. *FAO Fish. Circ.* 937, 1–100.
- 670 Brown, S.D.J., Collins, R.A., Boyer, S., LEFORT, M.-C., Malumbres-Olarteapa, J., Vink, C.J.,  
671 Cruickshank, R.H., 2012. Spider: an R package for the analysis of species identity and  
672 evolution, with particular reference to DNA barcoding. *Mol. Ecol. Resour.* 12, 562–565.
- 673 Calixto-Albarrán, I., Osorno, J.-L., 2000. The diet of the Magnificent Frigatebird during chick  
674 rearing. *Condor* 102, 569–576.

- 675 Carreon-Martinez, L., Heath, D.D., 2010. Revolution in food web analysis and trophic  
676 ecology: diet analysis by DNA and stable isotope analysis. *Mol. Ecol.* 19, 25–27.
- 677 Cavallo, C., Chiaradia, A., Deagle, B.E., McInnes, J.C., Sanchez, S., Hays, G.C., Reina, R.D.,  
678 2018. Molecular analysis of predator scats reveals role of salps in temperate inshore  
679 food webs. *Front. Mar. Sci.* 5, 1–14.
- 680 Cecere, J.G., Catoni, C., Gaibani, G., Geraldès, P., Celada, C., Imperio, S., 2015. Commercial  
681 fisheries, inter-colony competition and sea depth affect foraging location of breeding S  
682 copoli's shearwaters *Calonectris diomedea*. *Ibis (Lond. 1859)*. 157, 284–298.
- 683 Centro de Investigacion Dinamica de Ecosistemas Marinos de Altas Latitudes, 2017.  
684 Amphipods could play a role similar to krill in the Antarctic benthos. [Press release].  
685 Retrieves from [https://www.centroideal.cl/2017/amphipods-could-play-role-similar-to-](https://www.centroideal.cl/2017/amphipods-could-play-role-similar-to-krill-in-the-antarctic-benthos/)  
686 [krill-in-the-antarctic-benthos/](https://www.centroideal.cl/2017/amphipods-could-play-role-similar-to-krill-in-the-antarctic-benthos/)
- 687 Chamberlain, S.A., Szöcs, E., 2013. taxize: taxonomic search and retrieval in R.  
688 F1000Research 2.
- 689 Chérel, Y., Hobson, K.A., Weimerskirch, H., 2000. Using stable-isotope analysis of feathers to  
690 distinguish moulting and breeding origins of seabirds. *Oecologia* 122, 155–162.
- 691 Connell, A.M., Dunn, M.R., Forman, J., 2010. Diet and dietary variation of New Zealand hoki  
692 *Macruronus novaezelandiae*. *New Zeal. J. Mar. Freshw. Res.* 44, 289–308.
- 693 Corse, E., Costedoat, C., Chappaz, R., Pech, N., MARTIN, J.-F., Gilles, A., 2010. A PCR-based  
694 method for diet analysis in freshwater organisms using 18S rDNA barcoding on faeces.  
695 *Mol. Ecol. Resour.* 10, 96–108.
- 696 Couture-Beil, A., Couture-Beil, M.A., 2018. Package 'rjson.' URL [https://cran.r-project.](https://cran.r-project.org/web/packages/rjson/rjson.pdf)  
697 [org/web/packages/rjson/rjson.pdf](https://cran.r-project.org/web/packages/rjson/rjson.pdf).
- 698 Croxall, J.P., 1987. Seabirds: feeding ecology and role in marine ecosystems. Cambridge  
699 University Press.
- 700 Croxall, J.P., Hill, H.J., Lidstone-Scott, R., O'CONNELL, M.J., Prince, P.A., 1988. Food and  
701 feeding ecology of Wilson's storm petrel *Oceanites oceanicus* at South Georgia. *J. Zool.*  
702 216, 83–102.
- 703 Cury, P., Bakun, A., Crawford, R.J.M., Jarre, A., Quinones, R.A., Shannon, L.J., Verheye, H.M.,  
704 2000. Small pelagics in upwelling systems: patterns of interaction and structural  
705 changes in “wasp-waist” ecosystems. *ICES J. Mar. Sci.* 57, 603–618.
- 706 da Silva Fonseca, V.S., Petry, M.V., 2007. Evidence of food items used by *Fulmarus*  
707 *glacialoides* (Smith 1840)(Procellariiformes: Procellariidae) in Southern Brazil. *Polar*  
708 *Biol.* 30, 317–320.
- 709 Davies, K., Gascon, C., Margules, C.R., 2001. Habitat fragmentation: consequences,  
710 management and future research priorities. Island Press.
- 711 Davies, R.W.D., Cripps, S.J., Nickson, A., Porter, G., 2009. Defining and estimating global  
712 marine fisheries bycatch. *Mar. Policy* 33, 661–672.
- 713 Davison, A.C., Hinkley, D.V., 1997. Bootstrap methods and their application. Cambridge  
714 University Press.

- 715 Deagle, B.E., Gales, N.J., Evans, K., Jarman, S.N., Robinson, S., Trebilco, R., Hindell, M.A.,  
716 2007. Studying seabird diet through genetic analysis of faeces: a case study on  
717 macaroni penguins (*Eudyptes chrysolophus*). PLoS One 2, e831.
- 718 Deagle, B.E., Jarman, S.N., Pemberton, D., Gales, N.J., 2005. Genetic screening for prey in  
719 the gut contents from a giant squid (*Architeuthis sp.*). J. Hered. 96, 417–423.
- 720 Deagle, B.E., Kirkwood, R., Jarman, S.N., 2009. Analysis of Australian fur seal diet by  
721 pyrosequencing prey DNA in faeces. Mol. Ecol. 18, 2022–2038.
- 722 Deagle, B.E., Thomas, A.C., McInnes, J.C., Clarke, L.J., Vesterinen, E.J., Clare, E.L., Kartzinel,  
723 T.R., Eveson, J.P., 2019. Counting with DNA in metabarcoding studies: How should we  
724 convert sequence reads to dietary data? Mol. Ecol. 28, 391–406.
- 725 Dunn, M.R., Connell, A.M., Forman, J., Stevens, D.W., Horn, P.L., 2010. Diet of two large  
726 sympatric teleosts, the ling (*Genypterus blacodes*) and hake (*Merluccius australis*). PLoS  
727 One 5, e13647.
- 728 Egeater, B., Bishop, P.J., Robertson, B.C., 2015. Detecting frogs as prey in the diets of  
729 introduced mammals: a comparison between morphological and DNA-based diet  
730 analyses. Mol. Ecol. Resour. 15, 306–316.
- 731 Farias, A.A., Kittlein, M.J., 2008. Small-scale spatial variability in the diet of pampas foxes  
732 (*Pseudalopex gymnocercus*) and human-induced changes in prey base. Ecol. Res. 23,  
733 543–550.
- 734 Frainer, A., Primicerio, R., Kortsch, S., Aune, M., Dolgov, A. V, Fossheim, M., Aschan, M.M.,  
735 2017. Climate-driven changes in functional biogeography of Arctic marine fish  
736 communities. Proc. Natl. Acad. Sci. 114, 12202–12207.
- 737 Frederiksen, M., Wanless, S., Harris, M.P., Rothery, P., Wilson, L.J., 2004. The role of  
738 industrial fisheries and oceanographic change in the decline of North Sea black-legged  
739 kittiwakes. J. Appl. Ecol. 41, 1129–1139.
- 740 Freeman, A.N.D., 1998. Diet of Westland Petrels *Procellaria westlandica*: The importance of  
741 fisheries waste during chick-rearing. Emu 98, 36–43.
- 742 Froese, R. and Pauly, D., 2010. FishBase.
- 743 Furness, R.W., 2003. Impacts of fisheries on seabird communities. Sci. Mar. 67, 33–45.
- 744 Furness, R.W., Tasker, M.L., 2000. Seabird-fishery interactions: quantifying the sensitivity of  
745 seabirds to reductions in sandeel abundance, and identification of key areas for  
746 sensitive seabirds in the North Sea. Mar. Ecol. Prog. Ser. 202, 253–264.
- 747 Gaglio, D., Cook, T.R., McInnes, A., Sherley, R.B., Ryan, P.G., 2018. Foraging plasticity in  
748 seabirds: A non-invasive study of the diet of greater crested terns breeding in the  
749 Benguela region. PLoS One 13, e0190444.
- 750 Gales, R.P., 1988. The use of otoliths as indicators of Little Penguin *Eudyptula minor* diet. Ibis  
751 (Lond. 1859). 130, 418–426.
- 752 Gehan, E.A., 1965. A generalized Wilcoxon test for comparing arbitrarily singly-censored  
753 samples. Biometrika 52, 203–224.
- 754 Grémillet, D., Dell’Omo, G., Ryan, P.G., Peters, G., Ropert-Coudert, Y., Weeks, S.J., 2004.

- 755 Offshore diplomacy, or how seabirds mitigate intra-specific competition: a case study  
756 based on GPS tracking of Cape gannets from neighbouring colonies. *Mar. Ecol. Prog.*  
757 *Ser.* 268, 265–279.
- 758 Grémillet, D., Ponchon, A., Paleczny, M., Palomares, M.-L.D., Karpouzi, V., Pauly, D., 2018.  
759 Persisting worldwide seabird-fishery competition despite seabird community decline.  
760 *Curr. Biol.* 28, 4009–4013.
- 761 Guest, M.A., Frusher, S.D., Nichols, P.D., Johnson, C.R., Wheatley, K.E., 2009. Trophic effects  
762 of fishing southern rock lobster *Jasus edwardsii* shown by combined fatty acid and  
763 stable isotope analyses. *Mar. Ecol. Prog. Ser.* 388, 169–184.
- 764 Guillerault, N., Bouletreau, S., Iribar, A., Valentini, A., Santoul, F., 2017. Application of DNA  
765 metabarcoding on faeces to identify European catfish *Silurus glanis* diet. *J. Fish Biol.* 90,  
766 2214–2219.
- 767 Harding, A.M.A., Piatt, J.F., Schmutz, J.A., 2007. Seabird behavior as an indicator of food  
768 supplies: sensitivity across the breeding season. *Mar. Ecol. Prog. Ser.* 352, 269–274.
- 769 Hillebrand, H., Gamfeldt, L., Jonsson, P.R., Matthiessen, B., 2009. Consumer diversity  
770 indirectly changes prey nutrient content. *Mar. Ecol. Prog. Ser.* 380, 33–41.
- 771 Howells, R.J., Burthe, S.J., Green, J.A., Harris, M.P., Newell, M.A., Butler, A., Wanless, S.,  
772 Daunt, F., 2018. Pronounced long-term trends in year-round diet composition of the  
773 European shag *Phalacrocorax aristotelis*. *Mar. Biol.* 165, 188.
- 774 Imber, M.J., 1976. Comparison of prey of the black *Procellaria* petrels of New Zealand. *New*  
775 *Zeal. J. Mar. Freshw. Res.* 10, 119–130.
- 776 Jackson, R., 1958. The westland petrel. *Notornis* 7, 230–233.
- 777 Jarman, S.N., McInnes, J.C., Faux, C., Polanowski, A.M., Marthick, J., Deagle, B.E., Southwell,  
778 C., Emmerson, L., 2013. Adélie penguin population diet monitoring by analysis of food  
779 DNA in scats. *PLoS One* 8, e82227.
- 780 Johnson, M., Zaretskaya, I., Raytselis, Y., Merezhuik, Y., McGinnis, S., Madden, T.L., 2008.  
781 NCBI BLAST: a better web interface. *Nucleic Acids Res.* 36, W5–W9.
- 782 Kamenova, S., Mayer, R., Rubbmark, O.R., Coissac, E., Plantegenest, M., Traugott, M., 2018.  
783 Comparing three types of dietary samples for prey DNA decay in an insect generalist  
784 predator. *Mol. Ecol. Resour.* 18, 966–973.
- 785 Kerley, G.I.H., Landman, M., Ficetola, G.F., Boyer, F., Bonin, A., Rioux, D., Taberlet, P.,  
786 Coissac, E., 2018. Diet shifts by adult flightless dung beetles *Circellium bacchus*,  
787 revealed using DNA metabarcoding, reflect complex life histories. *Oecologia* 188, 107–  
788 115.
- 789 Klages, N.T.W., Cooper, J., 1992. Bill morphology and diet of a filter-feeding seabird: the  
790 broad-billed prion *Pachyptila vittata* at South Atlantic Gough Island. *J. Zool.* 227, 385–  
791 396.
- 792 Knox, G.A., 2006. *Biology of the southern ocean*. CRC Press.
- 793 Komura, T., Ando, H., Horikoshi, K., Suzuki, H., Isagi, Y., 2018. DNA barcoding reveals  
794 seasonal shifts in diet and consumption of deep-sea fishes in wedge-tailed

- 795 shearwaters. PLoS One 13, e0195385.
- 796 Kowalczyk, N.D., Chiaradia, A., Preston, T.J., Reina, R.D., 2015. Fine-scale dietary changes  
797 between the breeding and non-breeding diet of a resident seabird. R. Soc. open Sci. 2,  
798 140291.
- 799 Krüger, F., Clare, E.L., Symondson, W.O.C., Keišs, O., Petersons, G., 2014. Diet of the  
800 insectivorous bat *Pipistrellus nathusii* during autumn migration and summer residence.  
801 Mol. Ecol. 23, 3672–3683.
- 802 Landers, T.J., Rayner, M.J., Phillips, R.A., Hauber, M.E., 2011. Dynamics of seasonal  
803 movements by a trans-Pacific migrant, the Westland Petrel. Condor 113, 71–79.
- 804 Leal, G.R., Furness, R.W., McGill, R.A.R., Santos, R.A., Bugoni, L., 2017. Feeding and foraging  
805 ecology of Trindade petrels *Pterodroma arminjoniana* during the breeding period in the  
806 South Atlantic Ocean. Mar. Biol. 164, 211.
- 807 Lefort, M.-C., Cruickshank, R.H., Descovich, K., Adams, N.J., Barun, A., Emami-Khoyi, A.,  
808 Ridden, J., Smith, V.R., Sprague, R., Waterhouse, B., Boyer, S., 2019. Blood, sweat and  
809 tears: a review of non-invasive DNA sampling. bioRxiv 385120.
- 810 Leray, M., Meyer, C.P., Mills, S.C., 2015. Metabarcoding dietary analysis of coral dwelling  
811 predatory fish demonstrates the minor contribution of coral mutualists to their highly  
812 partitioned, generalist diet. PeerJ 3, e1047.
- 813 Livingston, M., Rutherford, K., 1988. Hoki wastes on west coast fishing grounds. Catch 15,  
814 16–17.
- 815 Lock, J.W., Thompson, D.R., Furness, R.W., Bartle, J.A., 1992. Metal concentrations in  
816 seabirds of the New Zealand region. Environ. Pollut. 75, 289–300.
- 817 Lyngdoh, S., Shrotriya, S., Goyal, S.P., Clements, H., Hayward, M.W., Habib, B., 2014. Prey  
818 preferences of the snow leopard (*Panthera uncia*): regional diet specificity holds global  
819 significance for conservation. PLoS One 9, e88349.
- 820 Marone, L., Olmedo, M., Valdés, D.Y., Zarco, A., de Casenave, J.L., Pol, R.G., 2017. Diet  
821 switching of seed-eating birds wintering in grazed habitats of the central Monte Desert,  
822 Argentina. Condor Ornithol. Appl. 119, 673–682.
- 823 McClatchie, S., Dunford, A., 2003. Estimated biomass of vertically migrating mesopelagic fish  
824 off New Zealand. Deep Sea Res. Part I Oceanogr. Res. Pap. 50, 1263–1281.
- 825 McCullagh, P., Nelder, J.A., 1989. Generalized Linear Models CRC Press.
- 826 McInnes, J.C., Alderman, R., Lea, M.-A., Raymond, B., Deagle, B.E., Phillips, R.A., Stanworth,  
827 A., Thompson, D.R., Catry, P., Weimerskirch, H., others, 2017a. High occurrence of  
828 jellyfish predation by black-browed and Campbell albatross identified by DNA  
829 metabarcoding. Mol. Ecol. 26, 4831–4845.
- 830 McInnes, J.C., Jarman, S.N., Lea, M.-A., Raymond, B., Deagle, B.E., Phillips, R.A., Catry, P.,  
831 Stanworth, A., Weimerskirch, H., Kusch, A., others, 2017b. DNA metabarcoding as a  
832 marine conservation and management tool: A circumpolar examination of fishery  
833 discards in the diet of threatened albatrosses. Front. Mar. Sci. 4, 277.
- 834 McMurdie, P.J., Holmes, S., 2012. Phyloseq: a bioconductor package for handling and



- 835 analysis of high-throughput phylogenetic sequence data, in: Biocomputing 2012. World  
836 Scientific, pp. 235–246.
- 837 Mollot, G., Duyck, P.-F., Lefeuvre, P., Lescourret, F., Martin, J.-F., Piry, S., Canard, E., Tixier,  
838 P., 2014. Cover cropping alters the diet of arthropods in a banana plantation: a  
839 metabarcoding approach. PLoS One 9, e93740.
- 840 Morrison, K.W., Bury, S.J., Thompson, D.R., 2014. Higher trophic level prey does not  
841 represent a higher quality diet in a threatened seabird: implications for relating  
842 population dynamics to diet shifts inferred from stable isotopes. Mar. Biol. 161, 2243–  
843 2255.
- 844 O’Driscoll, R.L., Gauthier, S., Devine, J.A., 2009. Acoustic estimates of mesopelagic fish: as  
845 clear as day and night? ICES J. Mar. Sci. 66, 1310–1317.
- 846 Ocké, M.C., 2013. Evaluation of methodologies for assessing the overall diet: dietary quality  
847 scores and dietary pattern analysis. Proc. Nutr. Soc. 72, 191–199.
- 848 Okes, N.C., Hockey, P.A.R., Pichegru, L., van der Lingen, C.D., Crawford, R.J.M., Grémillet, D.,  
849 2009. Competition for shifting resources in the southern Benguela upwelling: seabirds  
850 versus purse-seine fisheries. Biol. Conserv. 142, 2361–2368.
- 851 Oksanen, J., Blanchet, F.G., Kindt, R., Legendre, P., Minchin, P.R., O’hara, R.B., Simpson, G.L.,  
852 Solymos, P., Stevens, M.H.H., Wagner, H., others, 2013. Package ‘vegan.’ Community  
853 Ecol. Packag. version 2, 1–295.
- 854 Olmos-Pérez, L., Roura, Á., Pierce, G.J., Boyer, S., González, Á.F., 2017. Diet composition and  
855 variability of wild *Octopus vulgaris* and *Alloteuthis media* (Cephalopoda) paralarvae: A  
856 metagenomic approach. Front. Physiol. 8, 321.
- 857 OpenSeas, 2019. Associated Species Seabirds.
- 858 Oro, D., Bosch, M., Ruiz, X., 1995. Effects of a trawling moratorium on the breeding success  
859 of the Yellow-legged Gull *Larus cachinnans*. Ibis (Lond. 1859). 137, 547–549.
- 860 Oro, D., Jover, L., Ruiz, X., 1996. Influence of trawling activity on the breeding ecology of a  
861 threatened seabird, Audouin’s gull *Larus audouinii*. Mar. Ecol. Prog. Ser. 139, 19–29.
- 862 Paleczny, M., Hammill, E., Karpouzi, V., Pauly, D., 2015. Population trend of the world’s  
863 monitored seabirds, 1950-2010. PLoS One 10, e0129342.
- 864 Palomares, M.L.D., Pauly, D., 2010. SeaLifeBase. World Wide Web Electron. Publ.  
865 <http://www.sealifebase.org>.
- 866 Paradis, E., Strimmer, K., Claude, J., Jobb, G., Opgen-Rhein, R., Dutheil, J., Noel, Y., Bolker, B.,  
867 Lemon, J., 2005. ape: Analyses of Phylogenetics and Evolution. R Packag. 1.
- 868 Phillips, R.A., Petersen, M.K., Lilliendahl, K., Solmundsson, J., Hamer, K.C., Camphuysen, C.J.,  
869 Zonfrillo, B., 1999. Diet of the northern fulmar *Fulmarus glacialis*: reliance on  
870 commercial fisheries? Mar. Biol. 135, 159–170.
- 871 Pierce, G.J., Allcock, L., Bruno, I., Bustamante, P., Gonzalez, A., Guerra, A., Jereb, P.,  
872 Lefkaditou, E., Malham, S., Moreno, A., Pereira, J., Piatkowski, U., Rasero, M., Sánchez,  
873 P., Santos, B., Santurtún, M., Seixas, S. and Villanueva, R., 2010. Cephalopod biology  
874 and fisheries in Europe. ICES Cooperative Research Report, 303.



- 875 Pinol, J., San Andrés, V., Clare, E.L., Mir, G., Symondson, W.O.C., 2014. A pragmatic  
876 approach to the analysis of diets of generalist predators: The use of next-generation  
877 sequencing with no blocking probes. *Mol. Ecol. Resour.* 14, 18–26.
- 878 Prince, P.A., Morgan, R.A., 1987. Diet and feeding ecology of Procellariiformes. *Seabirds*  
879 *Feed. Ecol. role Mar. Ecosyst.* 135–171.
- 880 Quillfeldt, P., McGill, R.A.R., Furness, R.W., 2005. Diet and foraging areas of Southern Ocean  
881 seabirds and their prey inferred from stable isotopes: review and case study of Wilson’s  
882 storm-petrel. *Mar. Ecol. Prog. Ser.* 295, 295–304.
- 883 Quillfeldt, P., Schmoll, T., Peter, H.-U., 2000. The use of foot web coloration for the  
884 estimation of prebreeder numbers in Wilson’s storm-petrels, *Oceanites oceanicus*.  
885 *Polar Biol.* 23, 802–804.
- 886 Quillfeldt, P., Schmoll, T., Peter, H.-U., Eppelen, J.T., Lubjuhn, T., 2001. Genetic monogamy in  
887 Wilson’s storm-petrel. *The auk*, 118, 242–248.
- 888 Quillfeldt, P., Weimerskirch, H., Masello, J.F., Delord, K., McGill, R.A.R., Furness, R.W.,  
889 Chérel, Y., 2019. Behavioural plasticity in the early breeding season of pelagic seabirds-  
890 a case study of thin-billed prions from two oceans. *Mov. Ecol.* 7, 1.
- 891 Read, J., Bowen, Z., 2001. Population dynamics, diet and aspects of the biology of feral cats  
892 and foxes in arid South Australia. *Wildl. Res.* 28, 195–203.
- 893 Reid, K., Croxall, J.P., 2001. Environmental response of upper trophic-level predators reveals  
894 a system change in an Antarctic marine ecosystem. *Proc. R. Soc. London. Ser. B Biol.*  
895 *Sci.* 268, 377–384.
- 896 Rognes, T., Flouri, T., Nichols, B., Quince, C., Mahé, F., 2016. VSEARCH: a versatile open  
897 source tool for metagenomics. *PeerJ* 4, e2584.
- 898 Roper, C.F.E., Young, R.E., 1975. Vertical distribution of pelagic cephalopods. *Smithson.*  
899 *Contrib. to Zool.*
- 900 Ropert-Coudert, Y., Grémillet, D., Kato, A., Ryan, P.G., Naito, Y., Le Maho, Y., 2004. A fine-  
901 scale time budget of Cape gannets provides insights into the foraging strategies of  
902 coastal seabirds. *Anim. Behav.* 67, 985–992.
- 903 Ryan, P.G., Jackson, S., 1986. Stomach pumping: is killing seabirds necessary? *The auk*, 103,  
904 427–428.
- 905 Sheppard, S.K., Bell, J., Sunderland, K.D., Fenlon, J., Skervin, D., Symondson, W.O.C., 2005.  
906 Detection of secondary predation by PCR analyses of the gut contents of invertebrate  
907 generalist predators. *Mol. Ecol.* 14, 4461–4468.
- 908 Spear, L.B., Ainley, D.G., Walker, W.A., 2007. Foraging dynamics of seabirds in the eastern  
909 tropical Pacific Ocean. Norman, OK: Cooper Ornithological Society.
- 910 Stewart, F.M., Phillips, R.A., Bartle, J.A., Craig, J., Shooter, D., 1999. Influence of phylogeny,  
911 diet, moult schedule and sex on heavy metal concentrations in New Zealand  
912 Procellariiformes. *Mar. Ecol. Prog. Ser.* 178, 295–305.
- 913 Sullins, D.S., Haukos, D.A., Craine, J.M., Lautenbach, J.M., Robinson, S.G., Lautenbach, J.D.,  
914 Kraft, J.D., Plumb, R.T., Reitz, J.H., Sandercock, B.K., Fierer, N., 2018. Identifying the diet

- 915 of a declining prairie grouse using DNA metabarcoding. *Auk Ornithol. Adv.* 135, 583–  
916 608.
- 917 Sullivan, B.J., Reid, T.A., Bugoni, L., 2006. Seabird mortality on factory trawlers in the  
918 Falkland Islands and beyond. *Biol. Conserv.* 131, 495–504.
- 919 Suryan, R.M., Irons, D.B., Kaufman, M., Benson, J., Jodice, P.G.R., Roby, D.D., Brown, E.D.,  
920 2002. Short-term fluctuations in forage fish availability and the effect on prey selection  
921 and brood-rearing in the black-legged kittiwake *Rissa tridactyla*. *Mar. Ecol. Prog. Ser.*  
922 236, 273–287.
- 923 Sydeman, W.J., Poloczanska, E., Reed, T.E., Thompson, S.A., 2015. Climate change and  
924 marine vertebrates. *Sci.* 350, 772–777.
- 925 Taylor, G.A., 2000. Action Plan for Seabird Conservation in New Zealand: Threatened  
926 seabirds. Biodiversity Recovery Unit, Department of Conservation, 2000.
- 927 Team, R.C., 2013. R: A language and environment for statistical computing.
- 928 Thibault, M., Houlbrèque, F., Lorrain, A., Vidal, E., 2019. Seabirds: Sentinels beyond the  
929 oceans. *Sci.* 366, 813-1.
- 930 Thompson, D.R., Lilliendahl, K., Solmundsson, J., Furness, R.W., Waldron, S., Phillips, R.A.,  
931 1999. Trophic relationships among six species of Icelandic seabirds as determined  
932 through stable isotope analysis. *Condor* 101, 898–903.
- 933 Tuck, G.N., Phillips, R.A., Small, C., Thomson, R.B., Klaer, N.L., Taylor, F., Wanless, R.M.,  
934 Arrizabalaga, H., 2011. An assessment of seabird–fishery interactions in the Atlantic  
935 Ocean. *ICES J. Mar. Sci.* 68, 1628–1637.
- 936 Valentini, A., Taberlet, P., Miaud, C., Civade, R., Herder, J., Thomsen, P.F., Bellemain, E.,  
937 Besnard, A., Coissac, E., Boyer, F., others, 2016. Next-generation monitoring of aquatic  
938 biodiversity using environmental DNA metabarcoding. *Mol. Ecol.* 25, 929–942.
- 939 van Donk, S., Camphuysen, K.C.J., Shamoun-Baranes, J., van der Meer, J., 2017. The most  
940 common diet results in low reproduction in a generalist seabird. *Ecol. Evol.* 7, 4620–  
941 4629.
- 942 Vander Zanden, M.J., Shuter, B.J., Lester, N.P., Rasmussen, J.B., 2000. Within-and among-  
943 population variation in the trophic position of a pelagic predator, lake trout (*Salvelinus*  
944 *namaycush*). *Can. J. Fish. Aquat. Sci.* 57, 725–731.
- 945 Villanueva, R., Perricone, V., Fiorito, G., 2017. Cephalopods as predators: a short journey  
946 among behavioral flexibilities, adaptations, and feeding habits. *Front. Physiol.* 8, 598.
- 947 Vinson, M.R., Angradi, T.R., 2011. Stomach emptiness in fishes: sources of variation and  
948 study design implications. *Rev. Fish. Sci.* 19, 63–73.
- 949 Voss, N.A., Nesis, K.N., Rodhouse, P.G., 1998. The cephalopod family Histioteuthidae  
950 (Oegopsida): systematics, biology, and biogeography. *Smithson. Contrib. to Zool.* 293–  
951 372.
- 952 Wakefield, E.D., Bodey, T.W., Bearhop, S., Blackburn, J., Colhoun, K., Davies, R., Dwyer, R.G.,  
953 Green, J.A., Grémillet, D., Jackson, A.L., others, 2013. Space partitioning without  
954 territoriality in gannets. *Sci.* 341, 68–70.

- 955 Wang, Y., Naumann, U., Wright, S., Eddebuettel, D., Warton, D., 2017. mvabund: Statistical  
956 methods for analysing multivariate abundance data. R Packag. version 3.
- 957 Warham, J., 1990. The petrels: their ecology and breeding systems. A&C Black.
- 958 Watkins, B.P., Petersen, S.L., Ryan, P.G., 2008. Interactions between seabirds and deep-  
959 water hake trawl gear: an assessment of impacts in South African waters. Anim.  
960 Conserv. 11, 247–254.
- 961 Waugh, S.M., Griffiths, J.W., Poupart, T.A., Filippi, D.P., Rogers, K., Arnould, J.Y.P., 2018.  
962 Environmental factors and fisheries influence the foraging patterns of a subtropical  
963 seabird, the Westland Petrel (*Procellaria westlandica*), in the Tasman Sea. Condor  
964 Ornithol. Appl. 120, 371–387.
- 965 Waugh, S.M., MacKenzie, D.I., Fletcher, D., 2008. Seabird bycatch in New Zealand trawl and  
966 longline fisheries, 1998–2004, in: Papers and Proceedings of the Royal Society of  
967 Tasmania. pp. 45–66.
- 968 Waugh, S.M., Wilson, K.-J., 2017. Threats and threat status of the Westland Petrel  
969 *Procellaria westlandica*. Mar. Ornithol. 45, 195–203.
- 970 Whelan, C.J., Brown, J.S., Schmidt, K.A., Steele, B.B., Willson, M.F., 2000. Linking consumer--  
971 resource theory and digestive physiology: application to diet shifts. Evol. Ecol. Res. 2,  
972 911–934.
- 973 Wilson, R.P., 1984. An improved stomach pump for penquins and other seabirds. J. F.  
974 Ornithol. 55, 109–112.
- 975 Wood, G.C., Davis, L.S., 2003. Burrow occupancy in Westland petrels (*Procellaria*  
976 *westlandica*). Notornis 50, 123–127.
- 977 Wood, G.C., Otley, H.M., 2013. An assessment of the breeding range, colony sizes and  
978 population of the Westland petrel (*Procellaria westlandica*). New Zeal. J. Zool. 40, 186–  
979 195.
- 980 Xiang, Z.-F., Liang, W.-B., Nie, S.-G., Li, M., 2012. Diet and feeding behavior of *Rhinopithecus*  
981 *brelichi* at Yangaoping, Guizhou. Am. J. Primatol. 74, 551–560.
- 982 Xiong, W., Zhan, A., 2018. Testing clustering strategies for metabarcoding-based  
983 investigation of community--environment interactions. Mol. Ecol. Resour. 18, 1326–  
984 1338.
- 985 Ydenberg, R.C., Welham, C.V.J., Schmid-Hempel, R., Schmid-Hempel, P., Beauchamp, G.,  
986 1994. Time and energy constraints and the relationships between currencies in  
987 foraging theory. Behav. Ecol. 5, 28–34.
- 988
- 989

**Table 1.** OTU list after filtering the contaminants, low quality sequences and the sequences that gave no hits. For each OTU, the taxonomical classification is given, together with the standard parameters provided by the BLAST search against the NCBI database. The penultimate column indicates whether the OTU was identified in previous studies or not. The last column gives the depth at which each OTU is naturally found, and coloured rows indicates OTUs whose depth range overlaps with the dive depth of the Westland petrel.

| OTU_ID  | Phylum     | Class        | Order       | Family     | Genus           | Species                    | Size   | E-value   | % of identity | Alignment length | Query cover | Previously identified | Depth (m) |
|---------|------------|--------------|-------------|------------|-----------------|----------------------------|--------|-----------|---------------|------------------|-------------|-----------------------|-----------|
| OTU_40  | Arthropoda | Branchiopoda | Anostraca   | Artemiidae | <i>Artemia</i>  | <i>Artemia franciscana</i> | 1871   | 1.14E-88  | 0.994595      | 185              | 0.978723    | NO                    | 0.1-0.6   |
| OTU_391 | Arthropoda | Branchiopoda | Diplostraca | Daphniidae | Not identified  | Not identified             | 2      | 2.08E-26  | 0.860656      | 122              | 0.636842    | NO                    | -         |
| OTU_1   | Arthropoda | Malacostraca | Amphipoda   | Talitridae | Not identified  | Not identified             | 346004 | 9.69E-25  | 0.802260      | 177              | 0.982857    | NO                    | 0-0.1     |
| OTU_4   | Arthropoda | Malacostraca | Amphipoda   | Talitridae | Not identified  | Not identified             | 150978 | 3.49E-24  | 0.793296      | 179              | 0.988889    | NO                    | 0-0.1     |
| OTU_7   | Arthropoda | Malacostraca | Amphipoda   | Talitridae | Not identified  | Not identified             | 74647  | 3.44E-34  | 0.831522      | 184              | 0.988950    | NO                    | 0-0.1     |
| OTU_10  | Arthropoda | Malacostraca | Amphipoda   | Talitridae | Not identified  | Not identified             | 54540  | 3.51E-19  | 0.777174      | 184              | 0.983607    | NO                    | 0-0.1     |
| OTU_16  | Arthropoda | Malacostraca | Amphipoda   | Talitridae | Not identified  | Not identified             | 22487  | 3.44E-34  | 0.828729      | 181              | 0.988950    | NO                    | 0-0.1     |
| OTU_22  | Arthropoda | Malacostraca | Amphipoda   | Talitridae | Not identified  | Not identified             | 10161  | 5.71E-37  | 0.834254      | 181              | 0.983425    | NO                    | 0-0.1     |
| OTU_23  | Arthropoda | Malacostraca | Amphipoda   | Talitridae | Not identified  | Not identified             | 9847   | 5.88E-17  | 0.773481      | 181              | 0.983333    | NO                    | 0-0.1     |
| OTU_28  | Arthropoda | Malacostraca | Amphipoda   | Talitridae | Not identified  | Not identified             | 5507   | 9.69E-25  | 0.797753      | 178              | 0.983333    | NO                    | 0-0.1     |
| OTU_35  | Arthropoda | Malacostraca | Amphipoda   | Talitridae | Not identified  | Not identified             | 3213   | 4.51E-23  | 0.796610      | 177              | 0.982857    | NO                    | 0-0.1     |
| OTU_36  | Arthropoda | Malacostraca | Amphipoda   | Talitridae | Not identified  | Not identified             | 2757   | 1.61E-27  | 0.809783      | 184              | 0.988889    | NO                    | 0-0.1     |
| OTU_37  | Arthropoda | Malacostraca | Amphipoda   | Talitridae | Not identified  | Not identified             | 2757   | 3.51E-19  | 0.777174      | 184              | 0.983607    | NO                    | 0-0.1     |
| OTU_44  | Arthropoda | Malacostraca | Amphipoda   | Talitridae | Not identified  | Not identified             | 1624   | 4.48E-28  | 0.811111      | 180              | 0.983146    | NO                    | 0-0.1     |
| OTU_48  | Arthropoda | Malacostraca | Amphipoda   | Talitridae | Not identified  | Not identified             | 1404   | 1.61E-27  | 0.807692      | 182              | 0.983051    | NO                    | 0-0.1     |
| OTU_52  | Arthropoda | Malacostraca | Amphipoda   | Talitridae | Not identified  | Not identified             | 1303   | 5.88E-17  | 0.775956      | 183              | 0.982857    | NO                    | 0-0.1     |
| OTU_53  | Arthropoda | Malacostraca | Amphipoda   | Talitridae | Not identified  | Not identified             | 1260   | 7.49E-26  | 0.803279      | 183              | 0.988889    | NO                    | 0-0.1     |
| OTU_54  | Arthropoda | Malacostraca | Decapoda    | Pilumnidae | <i>Pilumnus</i> | <i>Pilumnus hirtellus</i>  | 986    | 1.89E-96  | 0.994975      | 199              | 0.990000    | NO                    | 10-80     |
| OTU_56  | Arthropoda | Malacostraca | Decapoda    | Penaeidae  | <i>Penaeus</i>  | <i>Penaeus merguensis</i>  | 913    | 5.21E-102 | 1.000000      | 206              | 0.990338    | NO                    | 10-45     |
| OTU_58  | Arthropoda | Malacostraca | Amphipoda   | Talitridae | Not identified  | Not identified             | 902    | 7.55E-21  | 0.786885      | 183              | 0.983425    | NO                    | 0-0.1     |
| OTU_76  | Arthropoda | Malacostraca | Amphipoda   | Talitridae | Not identified  | Not identified             | 407    | 1.63E-17  | 0.771739      | 184              | 0.983607    | NO                    | 0-0.1     |
| OTU_87  | Arthropoda | Malacostraca | Amphipoda   | Talitridae | Not identified  | Not identified             | 264    | 4.51E-23  | 0.794444      | 180              | 0.983333    | NO                    | 0-0.1     |

|         |            |              |           |            |                |                |     |          |          |     |          |    |       |
|---------|------------|--------------|-----------|------------|----------------|----------------|-----|----------|----------|-----|----------|----|-------|
| OTU_99  | Arthropoda | Malacostraca | Amphipoda | Talitridae | Not_identified | Not_identified | 197 | 2.11E-16 | 0.798611 | 144 | 0.842424 | NO | 0-0.1 |
| OTU_103 | Arthropoda | Malacostraca | Amphipoda | Talitridae | Not_identified | Not_identified | 188 | 7.60E-16 | 0.767956 | 181 | 0.988889 | NO | 0-0.1 |
| OTU_120 | Arthropoda | Malacostraca | Amphipoda | Talitridae | Not_identified | Not_identified | 125 | 3.46E-29 | 0.807692 | 182 | 0.983516 | NO | 0-0.1 |
| OTU_144 | Arthropoda | Malacostraca | Amphipoda | Talitridae | Not_identified | Not_identified | 60  | 3.54E-14 | 0.763441 | 186 | 0.983607 | NO | 0-0.1 |
| OTU_148 | Arthropoda | Malacostraca | Amphipoda | Talitridae | Not_identified | Not_identified | 56  | 7.55E-21 | 0.786096 | 187 | 0.983607 | NO | 0-0.1 |
| OTU_155 | Arthropoda | Malacostraca | Amphipoda | Talitridae | Not_identified | Not_identified | 51  | 1.27E-13 | 0.762162 | 185 | 0.983333 | NO | 0-0.1 |
| OTU_175 | Arthropoda | Malacostraca | Amphipoda | Talitridae | Not_identified | Not_identified | 34  | 2.07E-31 | 0.817680 | 181 | 0.983146 | NO | 0-0.1 |
| OTU_177 | Arthropoda | Malacostraca | Amphipoda | Talitridae | Not_identified | Not_identified | 33  | 1.62E-22 | 0.791209 | 182 | 0.988889 | NO | 0-0.1 |
| OTU_188 | Arthropoda | Malacostraca | Amphipoda | Talitridae | Not_identified | Not_identified | 28  | 1.63E-17 | 0.774194 | 186 | 0.983607 | NO | 0-0.1 |
| OTU_192 | Arthropoda | Malacostraca | Amphipoda | Eusiridae  | Not_identified | Not_identified | 27  | 5.92E-12 | 0.809091 | 110 | 0.675159 | NO | 1-3   |
| OTU_195 | Arthropoda | Malacostraca | Amphipoda | Talitridae | Not_identified | Not_identified | 25  | 2.08E-26 | 0.806630 | 181 | 0.983051 | NO | 0-0.1 |
| OTU_202 | Arthropoda | Malacostraca | Amphipoda | Talitridae | Not_identified | Not_identified | 23  | 1.61E-27 | 0.804469 | 179 | 0.988889 | NO | 0-0.1 |
| OTU_204 | Arthropoda | Malacostraca | Amphipoda | Talitridae | Not_identified | Not_identified | 22  | 1.27E-13 | 0.760870 | 184 | 0.983516 | NO | 0-0.1 |
| OTU_207 | Arthropoda | Malacostraca | Amphipoda | Talitridae | Not_identified | Not_identified | 21  | 7.49E-26 | 0.802260 | 177 | 0.983146 | NO | 0-0.1 |
| OTU_215 | Arthropoda | Malacostraca | Amphipoda | Talitridae | Not_identified | Not_identified | 18  | 9.83E-15 | 0.768817 | 186 | 0.983240 | NO | 0-0.1 |
| OTU_218 | Arthropoda | Malacostraca | Amphipoda | Talitridae | Not_identified | Not_identified | 16  | 7.55E-21 | 0.782609 | 184 | 0.983607 | NO | 0-0.1 |
| OTU_219 | Arthropoda | Malacostraca | Amphipoda | Talitridae | Not_identified | Not_identified | 16  | 7.55E-21 | 0.785714 | 182 | 0.988889 | NO | 0-0.1 |
| OTU_222 | Arthropoda | Malacostraca | Amphipoda | Talitridae | Not_identified | Not_identified | 13  | 1.27E-13 | 0.759563 | 183 | 0.983516 | NO | 0-0.1 |
| OTU_226 | Arthropoda | Malacostraca | Amphipoda | Talitridae | Not_identified | Not_identified | 12  | 9.69E-25 | 0.801105 | 181 | 0.983051 | NO | 0-0.1 |
| OTU_236 | Arthropoda | Malacostraca | Amphipoda | Talitridae | Not_identified | Not_identified | 11  | 2.13E-11 | 0.761364 | 176 | 0.987805 | NO | 0-0.1 |
| OTU_237 | Arthropoda | Malacostraca | Amphipoda | Talitridae | Not_identified | Not_identified | 11  | 2.64E-40 | 0.846995 | 183 | 0.983425 | NO | 0-0.1 |
| OTU_238 | Arthropoda | Malacostraca | Amphipoda | Talitridae | Not_identified | Not_identified | 11  | 1.26E-18 | 0.775956 | 183 | 0.978142 | NO | 0-0.1 |
| OTU_246 | Arthropoda | Malacostraca | Amphipoda | Talitridae | Not_identified | Not_identified | 10  | 2.68E-30 | 0.821229 | 179 | 0.988439 | NO | 0-0.1 |
| OTU_274 | Arthropoda | Malacostraca | Decapoda  | Axiidae    | Not_identified | Not_identified | 7   | 2.14E-06 | 0.737624 | 202 | 0.989418 | NO | 0-200 |
| OTU_275 | Arthropoda | Malacostraca | Amphipoda | Talitridae | Not_identified | Not_identified | 7   | 2.10E-21 | 0.788660 | 194 | 0.984293 | NO | 0-0.1 |
| OTU_276 | Arthropoda | Malacostraca | Amphipoda | Talitridae | Not_identified | Not_identified | 7   | 1.60E-32 | 0.827027 | 185 | 0.988889 | NO | 0-0.1 |
| OTU_300 | Arthropoda | Malacostraca | Amphipoda | Talitridae | Not_identified | Not_identified | 5   | 1.23E-38 | 0.840659 | 182 | 0.983425 | NO | 0-0.1 |

|         |            |                |                |                 |                       |                                    |       |           |          |     |          |                                                        |          |
|---------|------------|----------------|----------------|-----------------|-----------------------|------------------------------------|-------|-----------|----------|-----|----------|--------------------------------------------------------|----------|
| OTU_306 | Arthropoda | Malacostraca   | Amphipoda      | Talitridae      | Not_identified        | Not_identified                     | 4     | 9.69E-25  | 0.828571 | 140 | 0.857143 | NO                                                     | 0-0.1    |
| OTU_308 | Arthropoda | Malacostraca   | Amphipoda      | Talitridae      | Not_identified        | Not_identified                     | 4     | 3.51E-19  | 0.778378 | 185 | 0.983607 | NO                                                     | 0-0.1    |
| OTU_315 | Arthropoda | Malacostraca   | Amphipoda      | Talitridae      | Not_identified        | Not_identified                     | 4     | 9.76E-20  | 0.849057 | 106 | 0.656250 | NO                                                     | 0-0.1    |
| OTU_339 | Arthropoda | Malacostraca   | Amphipoda      | Talitridae      | Not_identified        | Not_identified                     | 3     | 5.75E-32  | 0.817680 | 181 | 0.983333 | NO                                                     | 0-0.1    |
| OTU_340 | Arthropoda | Malacostraca   | Amphipoda      | Talitridae      | Not_identified        | Not_identified                     | 3     | 2.66E-35  | 0.829670 | 182 | 0.983333 | NO                                                     | 0-0.1    |
| OTU_372 | Arthropoda | Malacostraca   | Amphipoda      | Talitridae      | Not_identified        | Not_identified                     | 2     | 9.76E-20  | 0.784530 | 181 | 0.982659 | NO                                                     | 0-0.1    |
| OTU_377 | Arthropoda | Malacostraca   | Amphipoda      | Pontogeneiidae  | Not_identified        | Not_identified                     | 2     | 9.83E-15  | 0.763441 | 186 | 0.988889 | NO                                                     | 5-90     |
| OTU_381 | Arthropoda | Malacostraca   | Amphipoda      | Talitridae      | Not_identified        | Not_identified                     | 2     | 1.25E-28  | 0.813187 | 182 | 0.988889 | NO                                                     | 0-0.1    |
| OTU_384 | Arthropoda | Malacostraca   | Amphipoda      | Talitridae      | Not_identified        | Not_identified                     | 2     | 1.62E-22  | 0.792350 | 183 | 0.983051 | NO                                                     | 0-0.1    |
| OTU_69  | Arthropoda | Maxillopoda    | Calanoida      | Candaciidae     | <i>Candacia</i>       | <i>Candacia armata</i>             | 487   | 4.23E-68  | 0.993243 | 148 | 0.980000 | NO                                                     | -        |
| OTU_59  | Chordata   | Actinopterygii | Anguilliformes | Nettastomatidae | Not_identified        | Not_identified                     | 877   | 3.23E-79  | 0.866906 | 278 | 0.992754 | NO                                                     | deep-sea |
| OTU_133 | Chordata   | Actinopterygii | Gadiformes     | Euclithyidae    | <i>Euclithys</i>      | <i>Euclithys polynemus</i>         | 84    | 5.10E-117 | 0.979839 | 248 | 0.991968 | NO                                                     | 250-920  |
| OTU_147 | Chordata   | Actinopterygii | Gadiformes     | Macrouridae     | <i>Coelorinchus</i>   | <i>Coelorinchus fasciatus</i>      | 57    | 5.10E-117 | 0.976096 | 251 | 0.992063 | Freeman, 1998 (genus level); Imber, 1976 (genus level) | 400-800  |
| OTU_47  | Chordata   | Actinopterygii | Gadiformes     | Macrouridae     | <i>Coelorinchus</i>   | <i>Coelorinchus oliverianus</i>    | 1434  | 2.36E-120 | 0.984064 | 251 | 0.992063 | Freeman, 1998 (genus level)                            | 400-600  |
| OTU_20  | Chordata   | Actinopterygii | Gadiformes     | Macrouridae     | <i>Lepidorhynchus</i> | <i>Lepidorhynchus denticulatus</i> | 15234 | 1.82E-121 | 0.984190 | 253 | 0.992126 | Freeman, 1998; Imber, 1976                             | 270-450  |
| OTU_12  | Chordata   | Actinopterygii | Gadiformes     | Merlucciidae    | <i>Macruronus</i>     | <i>Macruronus novaezelandiae</i>   | 36442 | 2.36E-120 | 0.984064 | 251 | 0.992063 | Freeman, 1998                                          | 200-700  |
| OTU_14  | Chordata   | Actinopterygii | Gadiformes     | Merlucciidae    | <i>Merluccius</i>     | <i>Merluccius australis</i>        | 33916 | 8.47E-120 | 0.984000 | 250 | 0.992032 | Freeman, 1998 (family level)                           | 28-1000  |
| OTU_86  | Chordata   | Actinopterygii | Gadiformes     | Moridae         | <i>Mora</i>           | <i>Mora moro</i>                   | 277   | 8.54E-115 | 0.972112 | 251 | 0.992032 | Freeman, 1998 (family level)                           | 450-2500 |
| OTU_32  | Chordata   | Actinopterygii | Ophidiiformes  | Ophidiidae      | <i>Genypterus</i>     | <i>Genypterus blacodes</i>         | 3548  | 1.41E-122 | 0.988095 | 252 | 0.992095 | NO                                                     | 300-550  |
| OTU_15  | Chordata   | Actinopterygii | Perciformes    | Triglidae       | <i>Lepidotrigla</i>   | <i>Lepidotrigla modesta</i>        | 33305 | 2.36E-120 | 0.984064 | 251 | 0.992063 | NO                                                     | 10-300   |
| OTU_18  | Chordata   | Actinopterygii | Scobriformes   | Trichiuridae    | Not_identified        | Not_identified                     | 15685 | 8.60E-110 | 0.946768 | 263 | 0.992424 | Imber, 1976 (family level)                             | 0-1600   |
| OTU_84  | Chordata   | Actinopterygii | Scobriformes   | Gempylidae      | <i>Rexea</i>          | Not_identified                     | 285   | 1.11E-108 | 0.952941 | 255 | 0.992188 | NO                                                     | 100-800  |
| OTU_77  | Chordata   | Actinopterygii | Zeiformes      | Zenionidae      | <i>Capromimus</i>     | <i>Capromimus abbreviatus</i>      | 380   | 5.06E-122 | 0.988048 | 251 | 0.992063 | NO                                                     | 87-500   |
| OTU_125 | Chordata   | Actinopterygii | Zeiformes      | Cyttidae        | <i>Cyttus</i>         | <i>Cyttus traversi</i>             | 104   | 5.06E-122 | 0.988048 | 251 | 0.992063 | Freeman, 1998 (genus level)                            | 200-978  |
| OTU_17  | Mollusca   | Cephalopoda    | Octopoda       | Octopodidae     | Not_identified        | Not_identified                     | 16331 | 1.14E-93  | 0.985000 | 200 | 0.990050 | Freeman, 1998; Imber, 1976 (genus level)               | 0-450    |
| OTU_71  | Mollusca   | Cephalopoda    | Oegopsida      | Histioteuthidae | <i>Histioteuthis</i>  | Not_identified                     | 479   | 5.55E-57  | 0.896739 | 184 | 0.989189 | Freeman, 1998; Imber, 1976                             | 300-1400 |
| OTU_6   | Mollusca   | Cephalopoda    | Teuthida       | Loiginidae      | Not_identified        | Not_identified                     | 86867 | 5.21E-102 | 0.986047 | 215 | 0.990741 | NO                                                     | 0-400    |

|         |          |             |          |             |                |                |      |           |          |     |          |    |       |
|---------|----------|-------------|----------|-------------|----------------|----------------|------|-----------|----------|-----|----------|----|-------|
| OTU_46  | Mollusca | Cephalopoda | Teuthida | Loliginidae | Not_identified | Not_identified | 1559 | 1.87E-101 | 0.985981 | 214 | 0.990698 | NO | 0-400 |
| OTU_134 | Mollusca | Cephalopoda | Teuthida | Loliginidae | Not_identified | Not_identified | 84   | 6.88E-86  | 0.989071 | 183 | 0.879227 | NO | 0-4   |

**Table 2.** Taxonomical classification of prey items in the diet of *P. westlandica* along with their Relative Read Abundance (RRA) and Frequency of Occurrence (FOO). Values are presented for the whole sampling and also detailed according to the two different seasons (Before Hatching: BH and Chick Rearing: CR) and according to the two different sites (Paparoa Natural Park: NP and the Private Land: PL).

| Phylum     | Class        | Order     | Family         | Species                    | Common name                | Total FOO (%) | Total RRA (%) | FOO BH (%) | FOO CR (%) | RRA BH (%) | RRA CR (%) | FOO NP (%) | FOO PL (%) | RRA NP (%) | RRA PL (%) |
|------------|--------------|-----------|----------------|----------------------------|----------------------------|---------------|---------------|------------|------------|------------|------------|------------|------------|------------|------------|
| Arthropoda |              |           |                |                            |                            | 86.2069       | 73.7939       | 80         | 91.4894    | 35.7822    | 94.1305    | 95.7447    | 75         | 89.7389    | 60.9839    |
|            | Branchiopoda |           |                |                            |                            | 4.5977        | 0.1988        | 2.5        | 6.3830     | 0.0755     | 0.2621     | 2.1277     | 7.5        | 0.0380     | 0.4346     |
|            |              | Anostraca |                |                            |                            | 3.4483        | 0.1986        | 2.5        | 4.2553     | 0.0755     | 0.2621     | 2.1277     | 5          | 0.0380     | 0.4341     |
|            |              |           | Artemiidae     |                            |                            | 3.4483        | 0.1986        | 2.5        | 4.2553     | 0.0755     | 0.2621     | 2.1277     | 5          | 0.0380     | 0.4341     |
|            |              |           |                | <i>Artemia franciscana</i> | Brine shrimp               | 3.4483        | 0.1986        | 2.5        | 4.2553     | 0.0755     | 0.2621     | 2.1277     | 5          | 0.0380     | 0.4341     |
|            |              | Cladocera |                |                            |                            | 1.1494        | 0.0002        | 0          | 2.1277     | 0          | 0.0003     | 0          | 2.5        | 0          | 0.2409     |
|            |              |           | Daphniidae     |                            |                            | 1.1494        | 0.0002        | 0          | 2.1277     | 0          | 0.0003     | 0          | 2.5        | 0          | 0.2409     |
|            | Malacostraca |           |                |                            |                            | 86.2069       | 73.5434       | 80         | 91.4894    | 35.7068    | 93.7934    | 95.7447    | 75         | 89.7009    | 60.4248    |
|            |              | Amphipoda |                |                            |                            | 85.0575       | 73.3412       | 77.5       | 91.4894    | 35.3488    | 93.6387    | 95.7447    | 72.5       | 89.5089    | 60.1839    |
|            |              |           | Eurisiidae     |                            |                            | 3.4483        | 0.0002        | 0          | 6.3830     | 0          | 0.0003     | 4.2553     | 2.5        | 0          | 0.0005     |
|            |              |           | Pontogeneiidae |                            |                            | 1.1494        | 0.0002        | 0          | 2.1277     | 0          | 0.0003     | 0          | 2.5        | 0          | 0.0005     |
|            |              |           | Talitridae     |                            | Landhoppers/sandhoppers    | 85.0575       | 73.3381       | 77.5       | 91.4894    | 35.3488    | 93.6352    | 95.7447    | 72.5       | 89.5065    | 60.1812    |
|            |              | Decapoda  |                |                            |                            | 3.4500        | 0.2023        | 5          | 2.1277     | 0.3579     | 0.1547     | 2.1277     | 5          | 0.1920     | 0.2409     |
|            |              |           | Axiidae        |                            | Thalassinidean crustaceans | 1.15          | 0.0007        | 0          | 2.1277     | 0          | 0.0011     | 2.1277     | 0          | 0          | 0.0018     |
|            |              |           | Penaeidae      |                            |                            | 2.3           | 0.0969        | 5          | 0          | 0.3579     | 0          | 0          | 5          | 0          | 0.2391     |
|            |              |           |                | <i>Penaeus merguensis</i>  | Banana shrimp              | 2.3           | 0.0969        | 5          | 0          | 0.3579     | 0          | 0          | 5          | 0          | 0.2391     |
|            |              |           | Pilumnidae     |                            |                            | 1.15          | 0.1046        | 0          | 2.1277     | 0          | 0.1536     | 2.1277     | 0          | 0.1920     | 0          |



|             |                |                           |                                    |                      |         |        |         |         |         |         |         |        |         |         |
|-------------|----------------|---------------------------|------------------------------------|----------------------|---------|--------|---------|---------|---------|---------|---------|--------|---------|---------|
|             |                | <i>Pilumnus hirtellus</i> | Bristly crab                       | 1.15                 | 0.1046  | 0      | 2.1277  | 0       | 0.1536  | 2.1277  | 0       | 0.1920 | 0       |         |
| Maxillopoda |                |                           |                                    | 1.1494               | 0.0517  | 0      | 2.1277  | 0       | 0.0751  | 0       | 2.5     | 0      | 0.1245  |         |
|             | Calanoida      |                           |                                    | 1.1494               | 0.0517  | 0      | 2.1277  | 0       | 0.0751  | 0       | 2       | 0      | 0.1245  |         |
|             |                | Candaciidae               |                                    | 1.1494               | 0.0517  | 0      | 2.1277  | 0       | 0.0751  | 0       | 2.5     | 0      | 0.1245  |         |
|             |                |                           | <i>Candacia armata</i>             | 1.1494               | 0.0517  | 0      | 2.1277  | 0       | 0.0751  | 0       | 2.5     | 0      | 0.1245  |         |
| Chordata    |                |                           |                                    | 37.9310              | 15.0296 | 45     | 31.9149 | 48.2577 | 2.7135  | 25.5319 | 52.5    | 3.9071 | 31.5495 |         |
|             | Actinopterygii |                           |                                    | 37.9310              | 15.0296 | 45     | 31.9149 | 48.2577 | 2.7135  | 25.5319 | 52.5    | 3.9071 | 31.5495 |         |
|             |                | Anguilliformes            |                                    | 1.1494               | 0.0931  | 2.5    | 0       | 0.3405  | 0       | 0       | 2.5     | 0      | 0.2275  |         |
|             |                |                           | Nettastomatidae                    | Duckbill eels        | 1.1494  | 0.0931 | 2.5     | 0       | 0.3405  | 0       | 0       | 2.5    | 0       | 0.2275  |
|             |                | Gadiformes                |                                    | 25.2874              | 9.2796  | 40     | 12.7660 | 33.6161 | 0.1368  | 14.8936 | 37.5    | 1.2149 | 21.0678 |         |
|             |                |                           | Euclichthyidae                     |                      | 1.1494  | 0.0089 | 0       | 2.1277  | 0       | 0.0130  | 0       | 2.5    | 0       | 0.0216  |
|             |                |                           | <i>Euclichthys polynemus</i>       | Eucla cod            | 1.1494  | 0.0089 | 0       | 2.1277  | 0       | 0.0130  | 0       | 2.5    | 0       | 0.0216  |
|             |                |                           | Macrouridae                        |                      | 6.8966  | 1.7749 | 12.5    | 2.1277  | 6.2599  | 0.0947  | 4.2553  | 10     | 0.1188  | 0.1188  |
|             |                |                           | <i>Coelorinchus fasciatus</i>      | Banded whiptail      | 1.1494  | 0.0060 | 2.5     | 0       | 0.0221  | 0       | 0       | 2.5    | 0       | 0.0148  |
|             |                |                           | <i>Coelorinchus oliverianus</i>    | Hawknose grenadier   | 2.2989  | 0.1522 | 2.5     | 2.1277  | 0.5152  | 0.0173  | 2.1277  | 2.5    | 0.0217  | 0.3441  |
|             |                |                           | <i>Lepidorhynchus denticulatus</i> | Thorntooth grenadier | 6.8966  | 1.6166 | 12.5    | 2.1277  | 5.7226  | 0.0773  | 4.2553  | 10     | 0.0971  | 3.8216  |
|             |                |                           | Merlucciidae                       |                      | 20.6897 | 7.4764 | 35      | 8.5106  | 27.2511 | 0.0291  | 10.6383 | 32.5   | 1.0962  | 16.7955 |
|             |                |                           | <i>Macruronus novaezealandiae</i>  | Hoki                 | 14.9425 | 3.8672 | 30      | 2.1277  | 14.0981 | 0.0240  | 8.5106  | 22.5   | 1.0936  | 8.0057  |
|             |                |                           | <i>Merluccius australis</i>        | Southern hake        | 10.3448 | 3.5992 | 15      | 6.3830  | 13.1530 | 0.0051  | 4.2553  | 17.5   | 0.0026  | 8.7899  |
|             |                |                           | Moridae                            |                      | 1.1494  | 0.0294 | 2.5     | 0       | 0.1051  | 0       | 0       | 2.5    | 0       | 0.0702  |
|             |                |                           | <i>Mora moro</i>                   | Common mora          | 1.1494  | 0.0294 | 2.5     | 0       | 0.1051  | 0       | 0       | 2.5    | 0       | 0.0702  |
|             |                | Ophidiiformes             |                                    | 3.4483               | 0.3765  | 5      | 2.1277  | 1.2306  | 0.0592  | 2.1277  | 5       | 0.0004 | 0.9196  |         |
|             |                |                           | Ophidiidae                         |                      | 3.4483  | 0.3765 | 5       | 2.1277  | 1.2306  | 0.0592  | 2.1277  | 5      | 0.0004  | 0.9196  |
|             |                |                           | <i>Genypterus blacodes</i>         | Pink cusk-eel        | 3.4483  | 0.3765 | 5       | 2.1277  | 1.2306  | 0.0592  | 2.1277  | 5      | 0.0004  | 0.9196  |
|             |                | Perciformes               |                                    | 9.1954               | 3.5343  | 15     | 4.2553  | 12.9452 | 0.0008  | 4.2553  | 15      | 0.0010 | 8.6461  |         |
|             |                |                           | Triglidae                          |                      | 9.1954  | 3.5343 | 15      | 4.2553  | 12.9452 | 0.0008  | 4.2553  | 15     | 0.0010  | 8.6461  |
|             |                |                           | <i>Lepidotrigla modesta</i>        | Cocky gunard         | 9.1954  | 3.5343 | 15      | 4.2553  | 12.9452 | 0.0008  | 4.2553  | 15     | 0.0010  | 8.6461  |
|             |                | Scombriformes             |                                    | 5.7471               | 1.6947  | 0      | 10.6383 | 0       | 2.4916  | 8.5106  | 2.5     | 2.6629 | 0.6003  |         |

|           |              |                                          |         |         |      |         |         |        |         |      |        |        |
|-----------|--------------|------------------------------------------|---------|---------|------|---------|---------|--------|---------|------|--------|--------|
|           | Gempylidae   |                                          | 1.1494  | 0.0302  | 0    | 2.1277  | 0       | 0.0438 | 2.1277  | 0    | 0.0547 | 0      |
|           |              | <i>Rexea sp.</i> Snake mackerels         | 1.1494  | 0.0302  | 0    | 2.1277  | 0       | 0.0438 | 2.1277  | 0    | 0.0547 | 0      |
|           | Trichiuridae |                                          | 5.7471  | 1.6645  | 0    | 10.6383 | 0       | 2.4478 | 8.5106  | 2.5  | 2.6082 | 0.6003 |
| Zeiformes |              |                                          | 4.5977  | 0.0514  | 5    | 4.2553  | 0.1252  | 0.0251 | 2.1277  | 7.5  | 0.0279 | 0.0884 |
|           | Cyttidae     |                                          | 1.1494  | 0.0110  | 2.5  | 0       | 0.0407  | 0      | 0       | 0    | 0.0000 | 0.0272 |
|           |              | <i>Cyttus traversi</i> King dory         | 1.1494  | 0.0110  | 2.5  | 0       | 0.0407  | 0      | 0       | 2.5  | 0      | 0.0272 |
|           | Zenionidae   |                                          | 3.4483  | 0.0403  | 2.5  | 4.2553  | 0.0845  | 0.0251 | 2.1277  | 5    | 0.0279 | 0.0612 |
|           |              | <i>Capromimus abbreviatus</i> Capro dory | 3.4483  | 0.0403  | 2.5  | 4.2553  | 0.0845  | 0.0251 | 2.1277  | 5    | 0.0279 | 0.0612 |
| Mollusca  |              |                                          | 56.3218 | 11.1766 | 57.5 | 55.3191 | 15.3105 | 3.1556 | 59.5745 | 52.5 | 6.3537 | 7.0328 |
|           | Cephalopoda  |                                          | 56.3218 | 11.1766 | 57.5 | 55.3191 | 15.3105 | 3.1556 | 59.5745 | 52.5 | 6.3537 | 7.0328 |
|           | Oegopsida    |                                          | 1.1494  | 0.0508  | 0    | 2.1277  | 0       | 0.0754 | 2.1277  | 0    | 0.0943 | 0.0000 |
|           |              | Histioteuthidae Oegopsida squids         | 1.1494  | 0.0508  | 0    | 2.1277  | 0       | 0.0754 | 2.1277  | 0    | 0.0943 | 0.0000 |
|           | Octopoda     |                                          | 28.7356 | 1.7330  | 25   | 31.9149 | 2.5363  | 1.5208 | 29.7872 | 27.5 | 1.7319 | 1.9191 |
|           |              | Octopodidae Octopodids                   | 28.7356 | 1.7330  | 25   | 31.9149 | 2.5363  | 1.5208 | 29.7872 | 27.5 | 0.0279 | 0.0612 |
|           | Teuthida     |                                          | 31.0345 | 9.3927  | 35   | 27.6596 | 12.7742 | 1.6348 | 34.0426 | 27.5 | 4.6218 | 5.1137 |
|           |              | Loliginidae Pencil squids                | 31.0345 | 9.3927  | 35   | 27.6596 | 12.7742 | 1.6348 | 34.0426 | 27.5 | 4.6218 | 5.1137 |
